# Supplementary material for: Preparation of eco-friendly composite food packaging films based on gelatin and a matrine coconut acids ionic liquid
Source: Royal Society of Chemistry journal article supplement (doi:10.1039/d1nj02859f), 2021-01-01
Supplement: d1nj02859f8.pdf [file d1nj02859f8.pdf]

New Journal of Chemistry

## Supporting information

### Preparation of eco-friendly composite food packaging films based on gelatin and matrine coconut acids ionic liquid

Hao Wang<sup>a,b,#</sup>, Yixiang Du<sup>a,b,#</sup>, Zhenyuan Wang<sup>c</sup>, Wen Yu<sup>a,b</sup>, Ling Zhang<sup>d</sup>, Chengyu Wu<sup>a,b</sup>, Mi Wang<sup>a,b,\*</sup> and Jiaheng Zhang<sup>a,b,\*</sup>

<sup>a</sup>School of Material Sciences and Engineering, Harbin Institute of Technology (Shenzhen), Shenzhen, 518055, China

<sup>b</sup>Research Centre of Printed Flexible Electronics, School of Materials Science and Engineering, Harbin Institute of Technology, Shenzhen, 518055, China.

<sup>c</sup>Shenzhen Shinesky Biological Technology Co., Ltd., Taoyuan Street, Nanshan District, Shenzhen, 518055, China

<sup>d</sup>School of Material Science, Harbin Institute of Technology (Shenzhen), Shenzhen, 518055, China

# These authors contributed equally to this work.

\*Corresponding Authors: Jiaheng Zhang, Mi Wang.

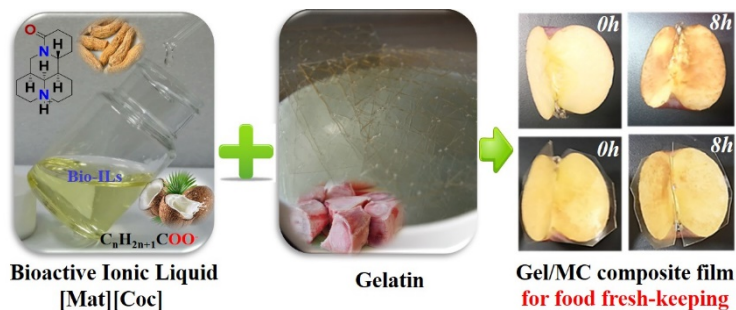

Eco-friendly food packaging films were prepared by compositing gelation with a bioactive ionic liquid showing excellent antioxidant and antibacterial properties.

### Structure analysis of [Mat][Coc]

As a reflection of electron density, ESP analysis is of great significance to non-covalent interaction systems. Fig.S1 shows the electrostatic potential of each model. Blue represents the area of electronegativity, and red represents the area of positive charge. The greater the electronegativity of the element, the stronger the ability of its atom to attract electrons in the compound, and the stronger the hydrogen bond formed. The positively charged regions of lauric acid, capric acid, and caprylic acid are attracted to the negatively charged regions of matrine, obtaining stable [Mat][C12], [Mat][C10], [Mat][C8] configurations. This is also consistent with the conclusion in text 3.1 that the position of the hydrogen bond between the two and the strength of the hydrogen bond are high.

The front-line orbit proves that the electron gains and losses between the components and the degree of difficulty in the synthesis process and its energy level of ILS were shown Fig.S2. The smaller the value of  $\Delta E$  (LUMO-HOMO), the more unstable the molecule and the easier the reaction. For matrine lauric acid, matrine lauric acid, matrine caprylic acid ionic liquids, the difference in  $\Delta E$  (LUMO-HOMO) values is very small, so the degree of difficulty of the reaction should be the same.

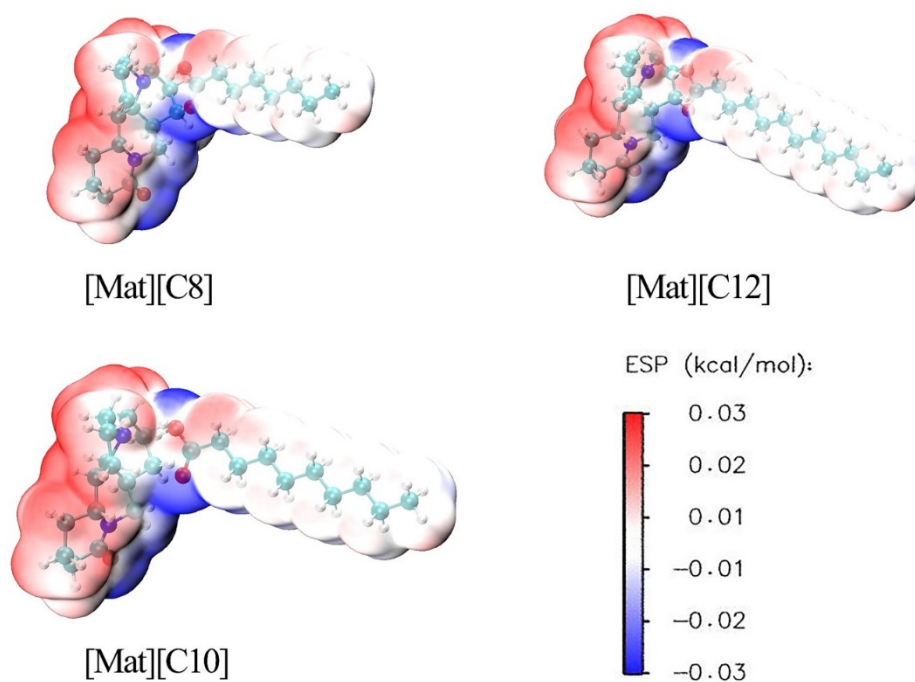

Fig.S1 Electrostatic potential diagram of matrine coconut acids

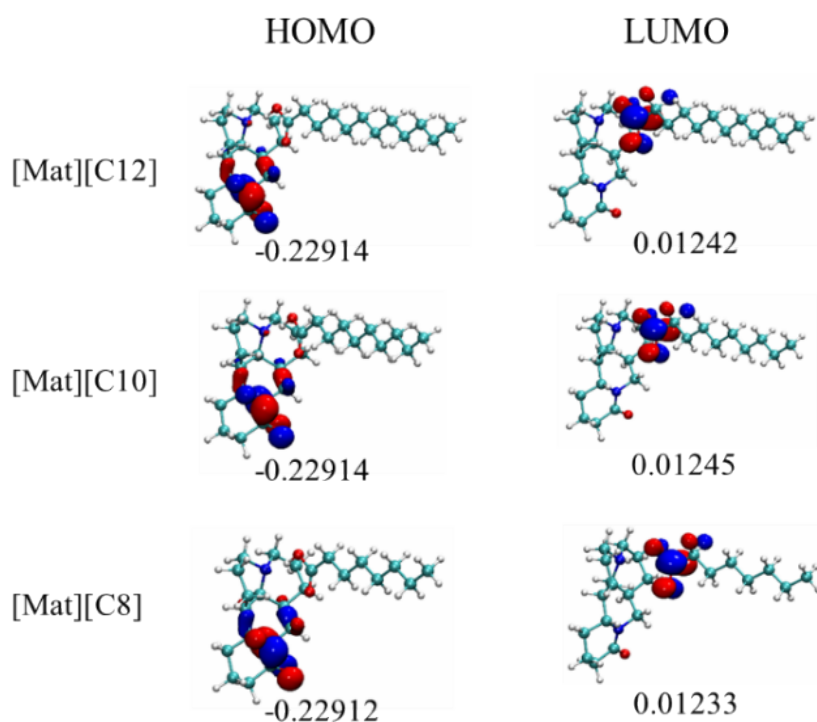

**Fig.S2 Front Line Map of matrine coconut acids**

### **Antioxidant Activity**

In the ABTS free radical scavenging experiment, the standard curve of vitamin E (Trolox) on ABTS free radical scavenging was used to compare the antioxidant effect of the prepared [Mat][Coc] and the standard sample Trolox. By measuring the absorbance values of solutions with Trolox concentrations of 0.05 mM, 0.10 mM, 0.15 mM, 0.20 mM, and 0.30 Mm at 734 nm, a regression equation of Trolox's standard curve is  $Y=0.58326 -1.2017X$  obtained after subtracting the blank base from the obtained data (Fig.S3). Preparing mixed solutions of samples with different concentrations of [Mat][Coc] at 0.002  $\mu\text{l/ml}$ , 0.01  $\mu\text{l/ml}$ , 0.02  $\mu\text{l/ml}$  and 0.04  $\mu\text{l/ml}$  with ABTS working solution, reacting for 6 min under dark conditions, and measuring their absorbance (Table S1).

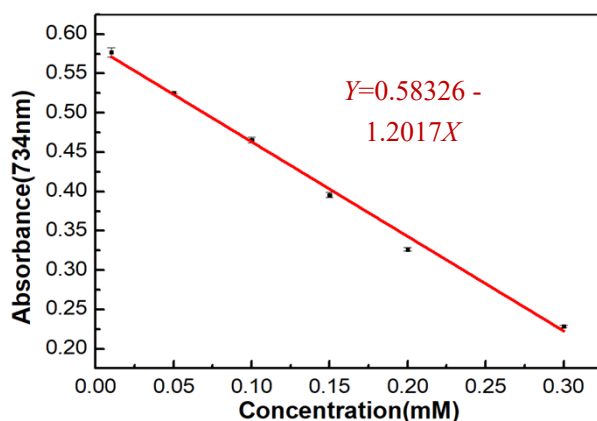

Fig.S3 Trolox standard curve

Table S1 Concentration ratio of matrine and coconut acid and Trolox equivalent

| MC          | Distilled water | ABTS working solution | Sample concentration | Trolox equivalent |
|-------------|-----------------|-----------------------|----------------------|-------------------|
| 10 $\mu$ l  | 490 $\mu$ l     | 4.5 ml                | 0.002 $\mu$ l/ml     | 0.20 mM           |
| 50 $\mu$ l  | 450 $\mu$ l     | 4.5 ml                | 0.01 $\mu$ l/ml      | 0.42 mM           |
| 100 $\mu$ l | 400 $\mu$ l     | 4.5 ml                | 0.02 $\mu$ l/ml      | 0.45 mM           |
| 200 $\mu$ l | 300 $\mu$ l     | 4.5 ml                | 0.04 $\mu$ l/ml      | 0.45 mM           |

### Antibacterial activity

Table S2 compares the antimicrobial activities of [Mat][Coc] with different inclusion and absorbance.

Table S2 Concentration ratio of antibacterial test

| Concentration | Bacteria   | Culture medium | Sample      |
|---------------|------------|----------------|-------------|
| 0% (control)  | 10 $\mu$ l | 990 $\mu$ l    | 0 $\mu$ l   |
| 5%            | 10 $\mu$ l | 940 $\mu$ l    | 50 $\mu$ l  |
| 10%           | 10 $\mu$ l | 890 $\mu$ l    | 100 $\mu$ l |
| 20%           | 10 $\mu$ l | 790 $\mu$ l    | 200 $\mu$ l |
| 30%           | 10 $\mu$ l | 690 $\mu$ l    | 300 $\mu$ l |

### Structural Analysis

Table S3 Thicknesses of the Gel/MC composite films ( $\mu$ m)

| Content   | 5% MC            | 10% MC           | 20% MC           | 30% MC          |
|-----------|------------------|------------------|------------------|-----------------|
| Thickness | 101.2 $\pm$ 2.56 | 102.4 $\pm$ 3.44 | 100.6 $\pm$ 3.93 | 99.4 $\pm$ 4.63 |

### Optical Properties

The light transmittance and transparency of the sample can be characterized through the measurement of light transmittance and haze. With 550 nm representing the wavelength of visible light, the transmittance and haze of the prepared composite film were measured(Fig.S4). In Fig.S5 a), it can be seen that the sample also has a light transmittance of about 90% in the infrared range. But in Fig.S5 b) ,the light

transmittance is continuously decreasing with the content of matrine coconut acid increases from 10% to 30% in the short wavelength range of 260 nm-400 nm. This shows that the addition of matrine coco acid improves the resistance of the composite film to ultraviolet rays.

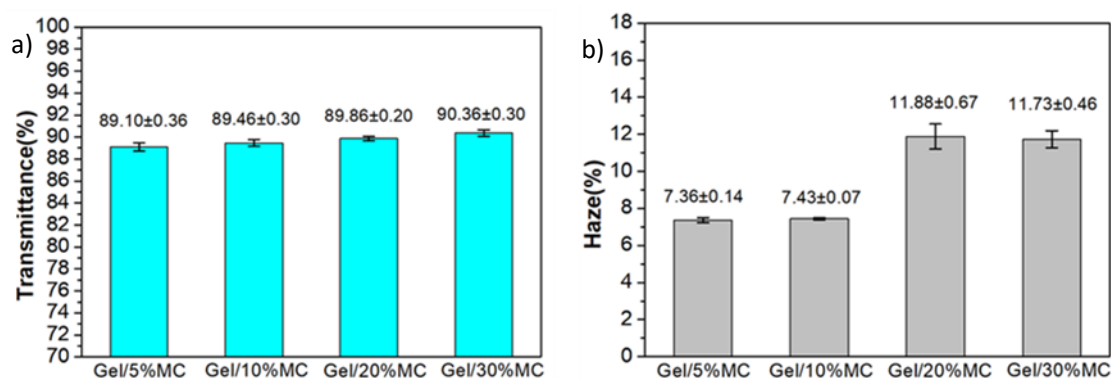

**Fig. S4 a) Transmittance b) Haze of Gel/5%MC, Gel/10%MC, Gel/20%MC, Gel/30%MC**

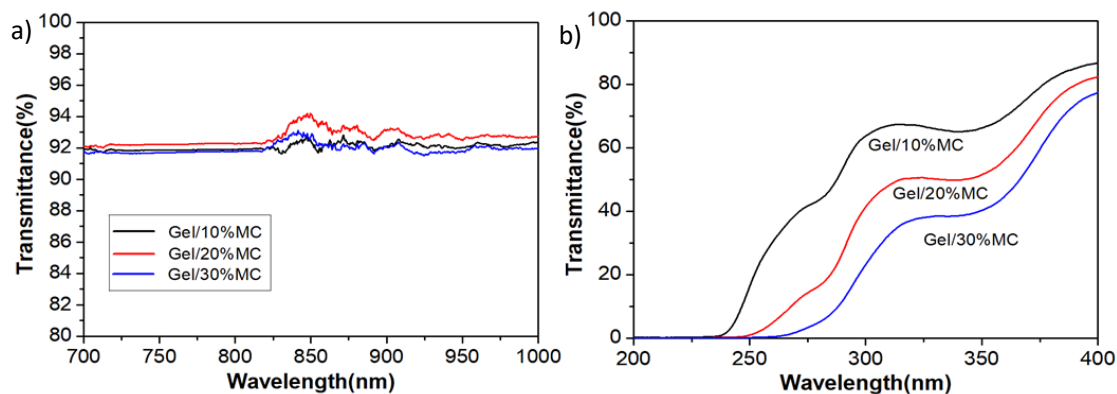

**Fig. S5 Light transmittance of Gel/10%MC, Gel/20%MC, Gel/30%MC in the infrared a) 700-1000nm and ultraviolet b) 200-400nm**

X-ray diffraction analysis was performed on the prepared film. The pure gelatin film is highly amorphous. As can be seen in Fig.S6, the XRD patterns of the Gel/MC composite films all exhibited broad peaks at around  $2\theta = 20^\circ$ , which is similar to that of pure gelatin ([31] *Cent Eur J Chem*, 2009, 7, 721-730). With different content of [Mat][Coc], the slight changes of the peak intensity and peak position are induced by the interactions between gelatin and [Mat][Coc].

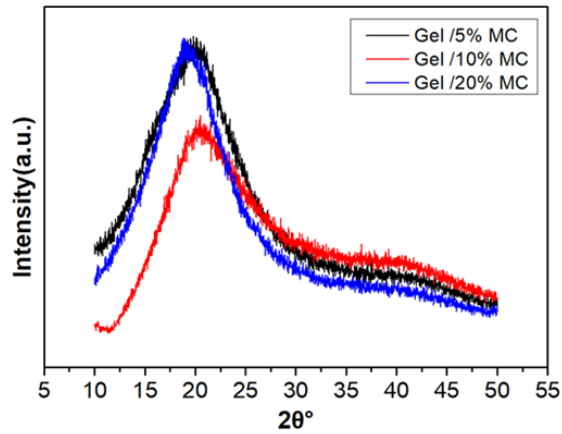

Fig.S6 XRD patterns of Gel/5%MC, Gel/10%MC and Gel/20%MC

## Comparison with other bioactive gelatin-based films for food packaging

Table S4 Properties of some bioactive gelatin-based films

| Polymer Matrix   | Plasticizer     | Functional Additives              | <i>TS</i> (MPa) | <i>EAB</i> (%) | WVP( $\times 10^{-11}$ gm <sup>-1</sup> s <sup>-1</sup> Pa <sup>-1</sup> ) | Anti-bacterial | Anti-oxidant | Fresh keeping | Ref.      |
|------------------|-----------------|-----------------------------------|-----------------|----------------|----------------------------------------------------------------------------|----------------|--------------|---------------|-----------|
| gelatin          | 30% glycerol    | 1/30 green tea extract            | 20.79           | 44.62          | 2094                                                                       | --             | √            | √             | [27]      |
| gelatin-chitosan | --              | --                                | 16.1            | 9.34           | 7750                                                                       | √              | √            | √             | [28]      |
|                  |                 | quercetin-starch                  | 17.11           | 5.1            | 7570                                                                       |                |              |               |           |
| gelatin          | 30% glycerol    | 50% Kaffir Lime                   | 34.22           | 30.93          | 3.38                                                                       | --             | √            | --            | [32]      |
|                  |                 | 50% bergamot                      | 36.52           | 19.96          | 3.22                                                                       |                |              |               |           |
|                  |                 | 50% lemon                         | 31.06           | 52.66          | 2.85                                                                       |                |              |               |           |
| gelatin-chitosan | 30% glycerol    | 0.4% origanum vulgare L           | 38.82           | 35.31          | 22.13                                                                      | √              | --           | --            | [33]      |
| gelatin          | 25% glycerol    | 1% carvacrol                      | ~3.5            | ~130           | ~8.75                                                                      | √              | √            | --            | [34]      |
| gelatin          | 25% glycerol    | 0.7% green tea extract            | 36.63           | 42.53          | 9.2                                                                        | --             | √            | --            | [35]      |
| gelatin          | --              | 50% L-cysteine<br>1% ε-polylysine | 32.87           | 34.76          | ~22.5                                                                      | √              | √            | --            | [36]      |
| gelatin          | --              | 1.0%lecithin<br>0.5%thymol        | 2.96            | 94.72          | 7.19                                                                       | √              | --           | --            | [37]      |
| gelatin          | 20% glycerol    | rosmarinic acid<br>1%             | 36.39           | 65.58          | ~45                                                                        | √              | √            | --            | [38]      |
| gelatin-chitosan | 30% glycerol    | 1% melanin nanoparticles          | 41.8            | 9.7            | ~78                                                                        | --             | √            | --            | [39]      |
| gelatin          | 5 % [Mat][Coc]  |                                   | 45.56           | 7.71           | 0.0719                                                                     | √              | √            | √             | This Work |
|                  | 10 % [Mat][Coc] |                                   | 11.39           | 19.27          | 0.1293                                                                     |                |              |               |           |
