# Supplementary figures and images for: Preparation of eco-friendly composite food packaging films based on gelatin and a matrine coconut acids ionic liquid
Source: Royal Society of Chemistry journal article supplement (doi:10.1039/d1nj02859f), 2021-01-01

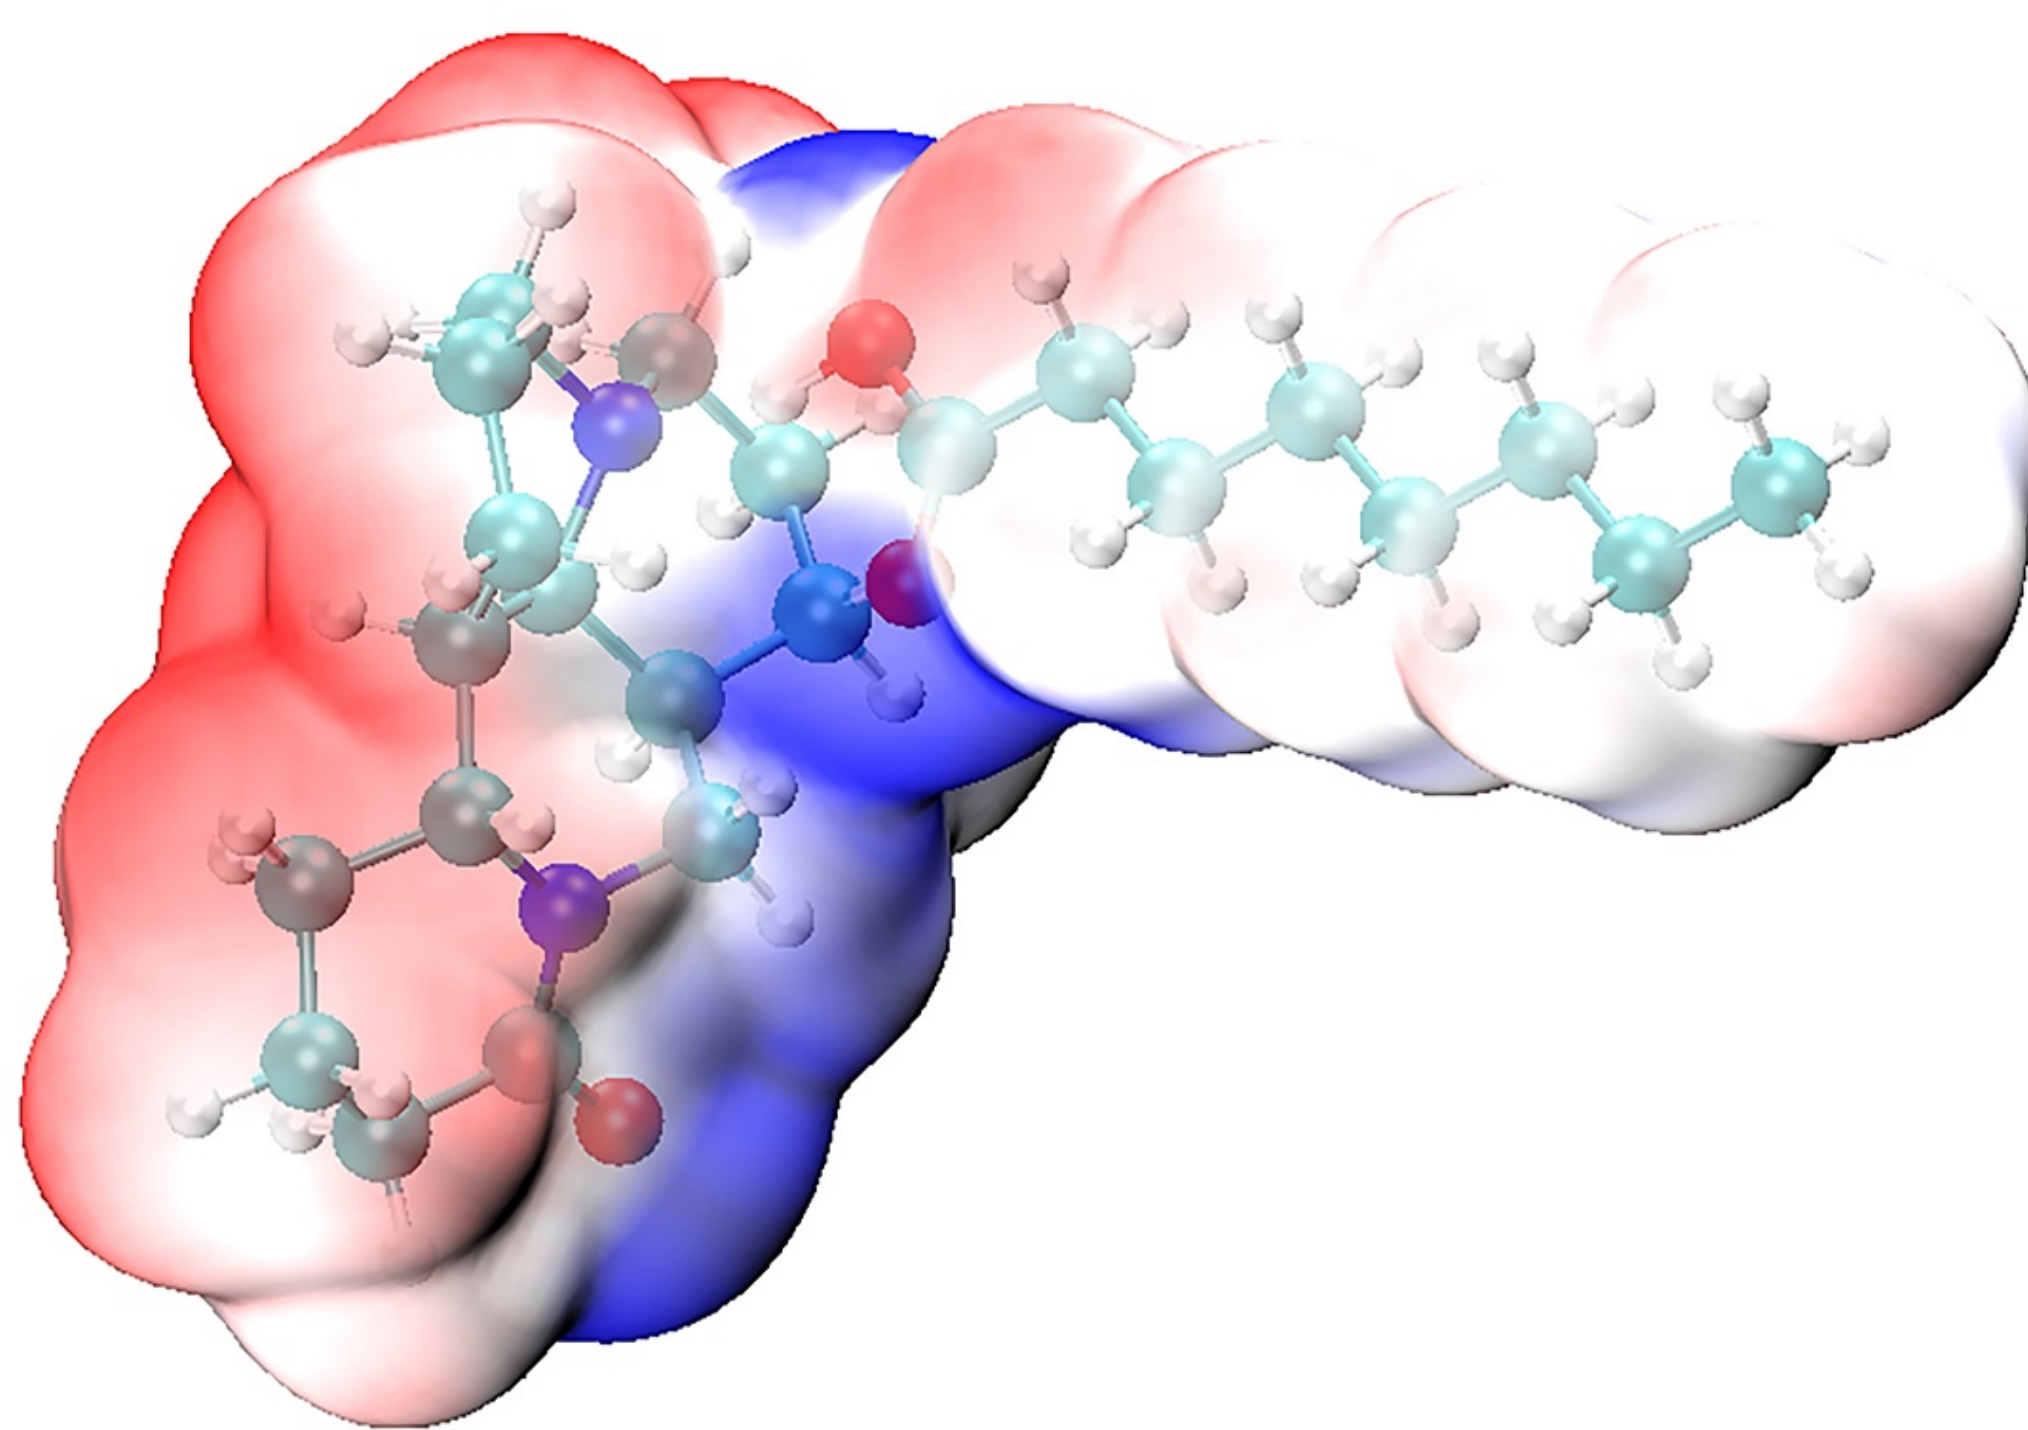

[Mat][C8]

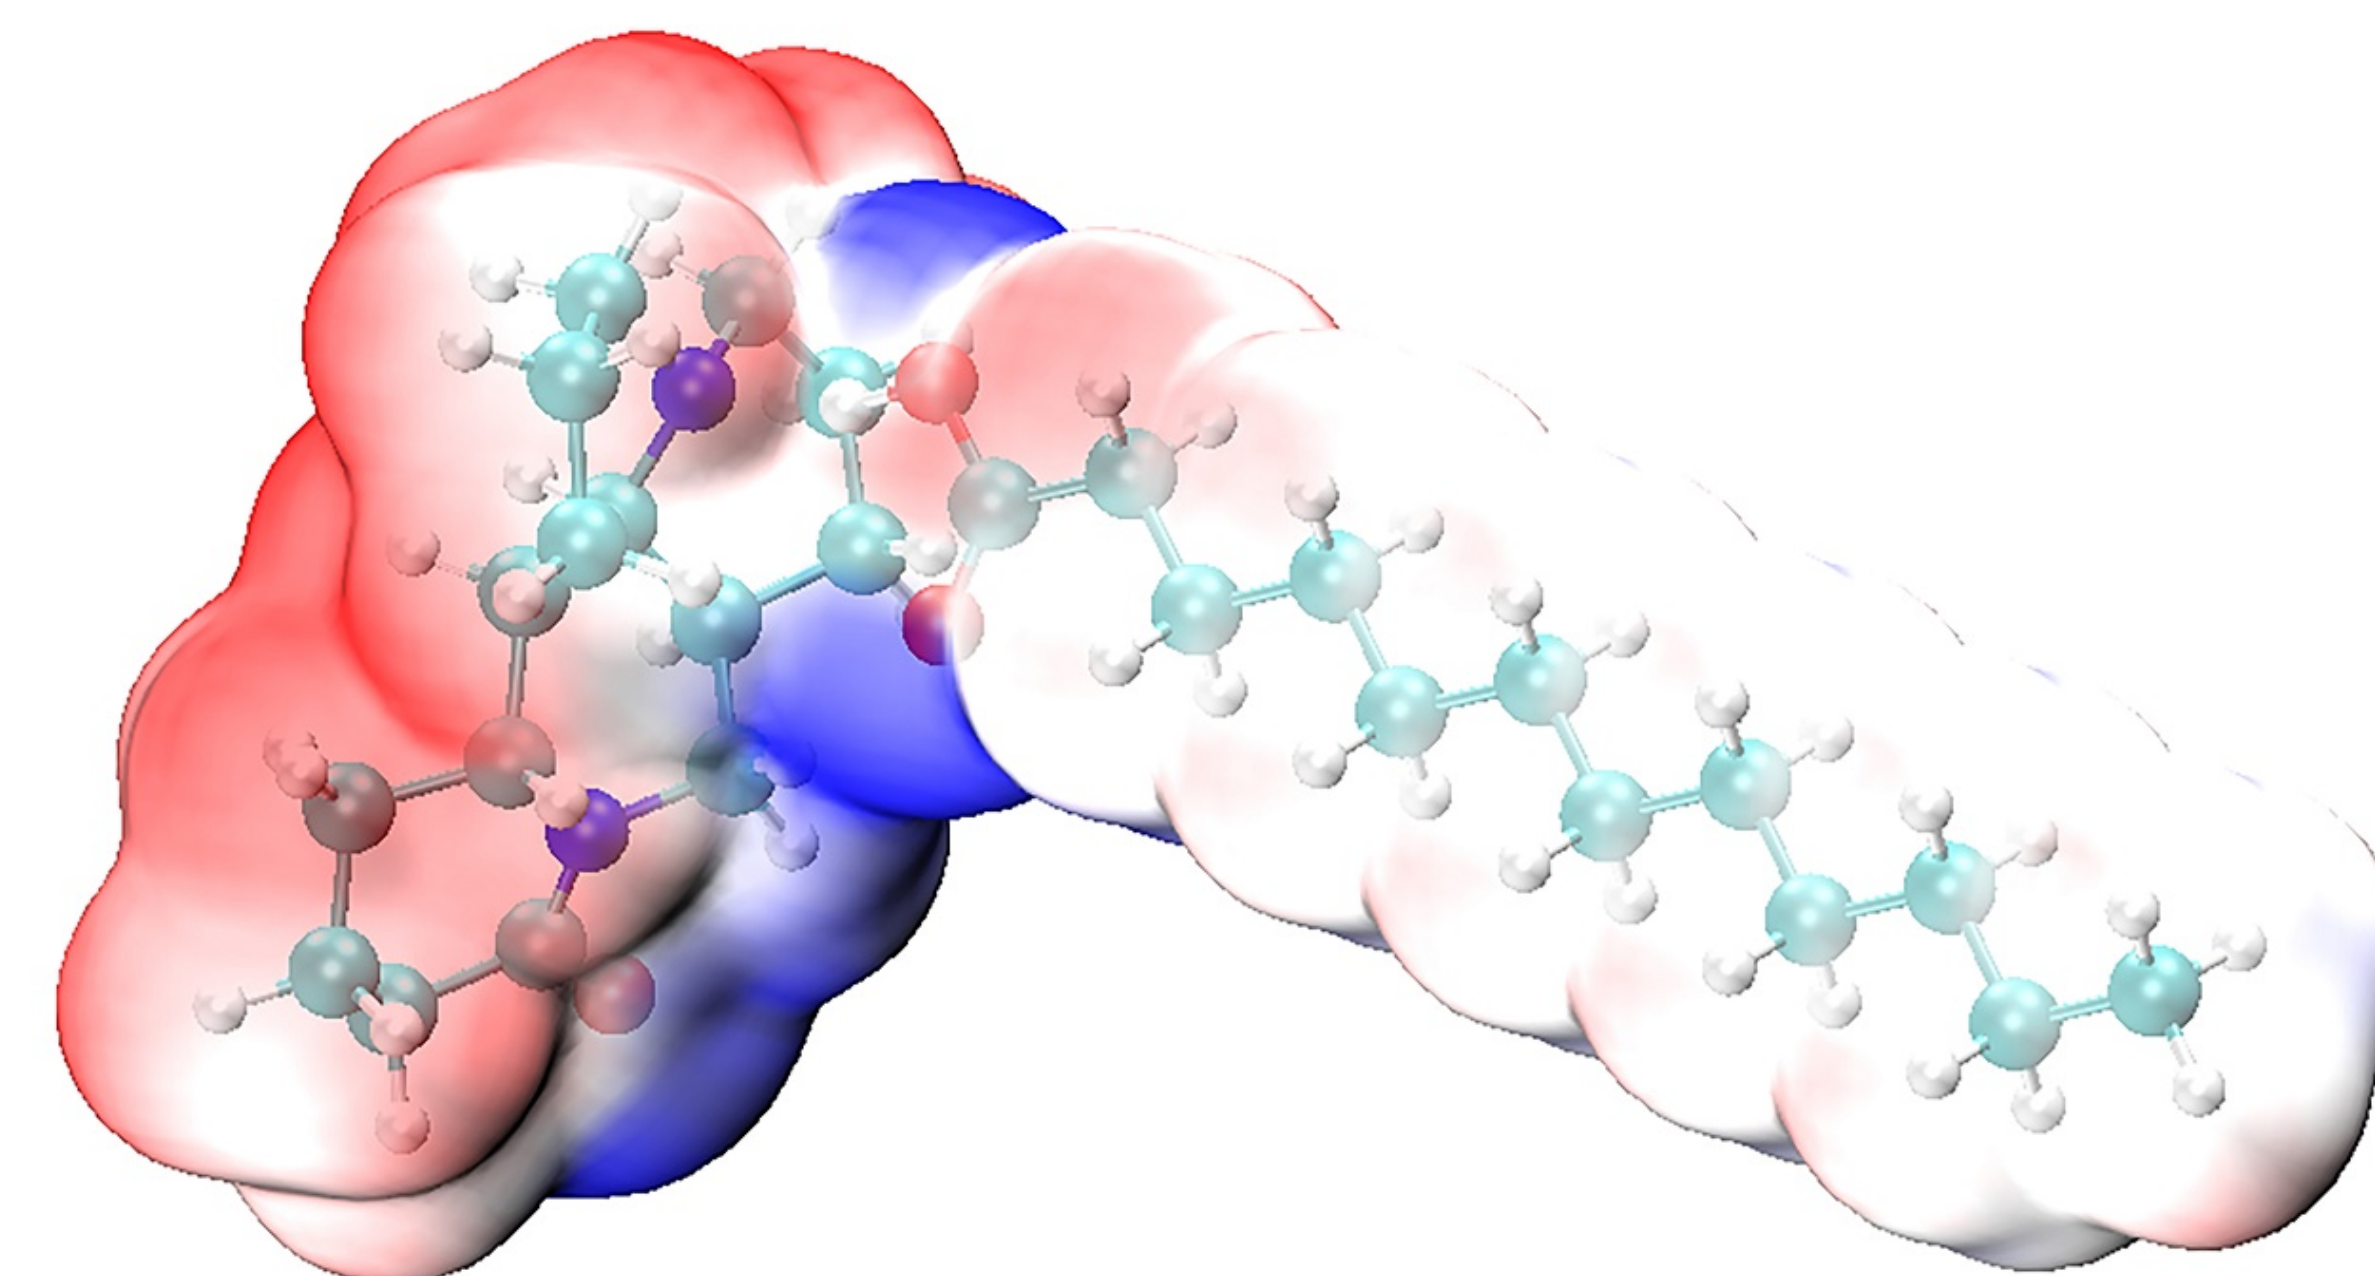

[Mat][C12]

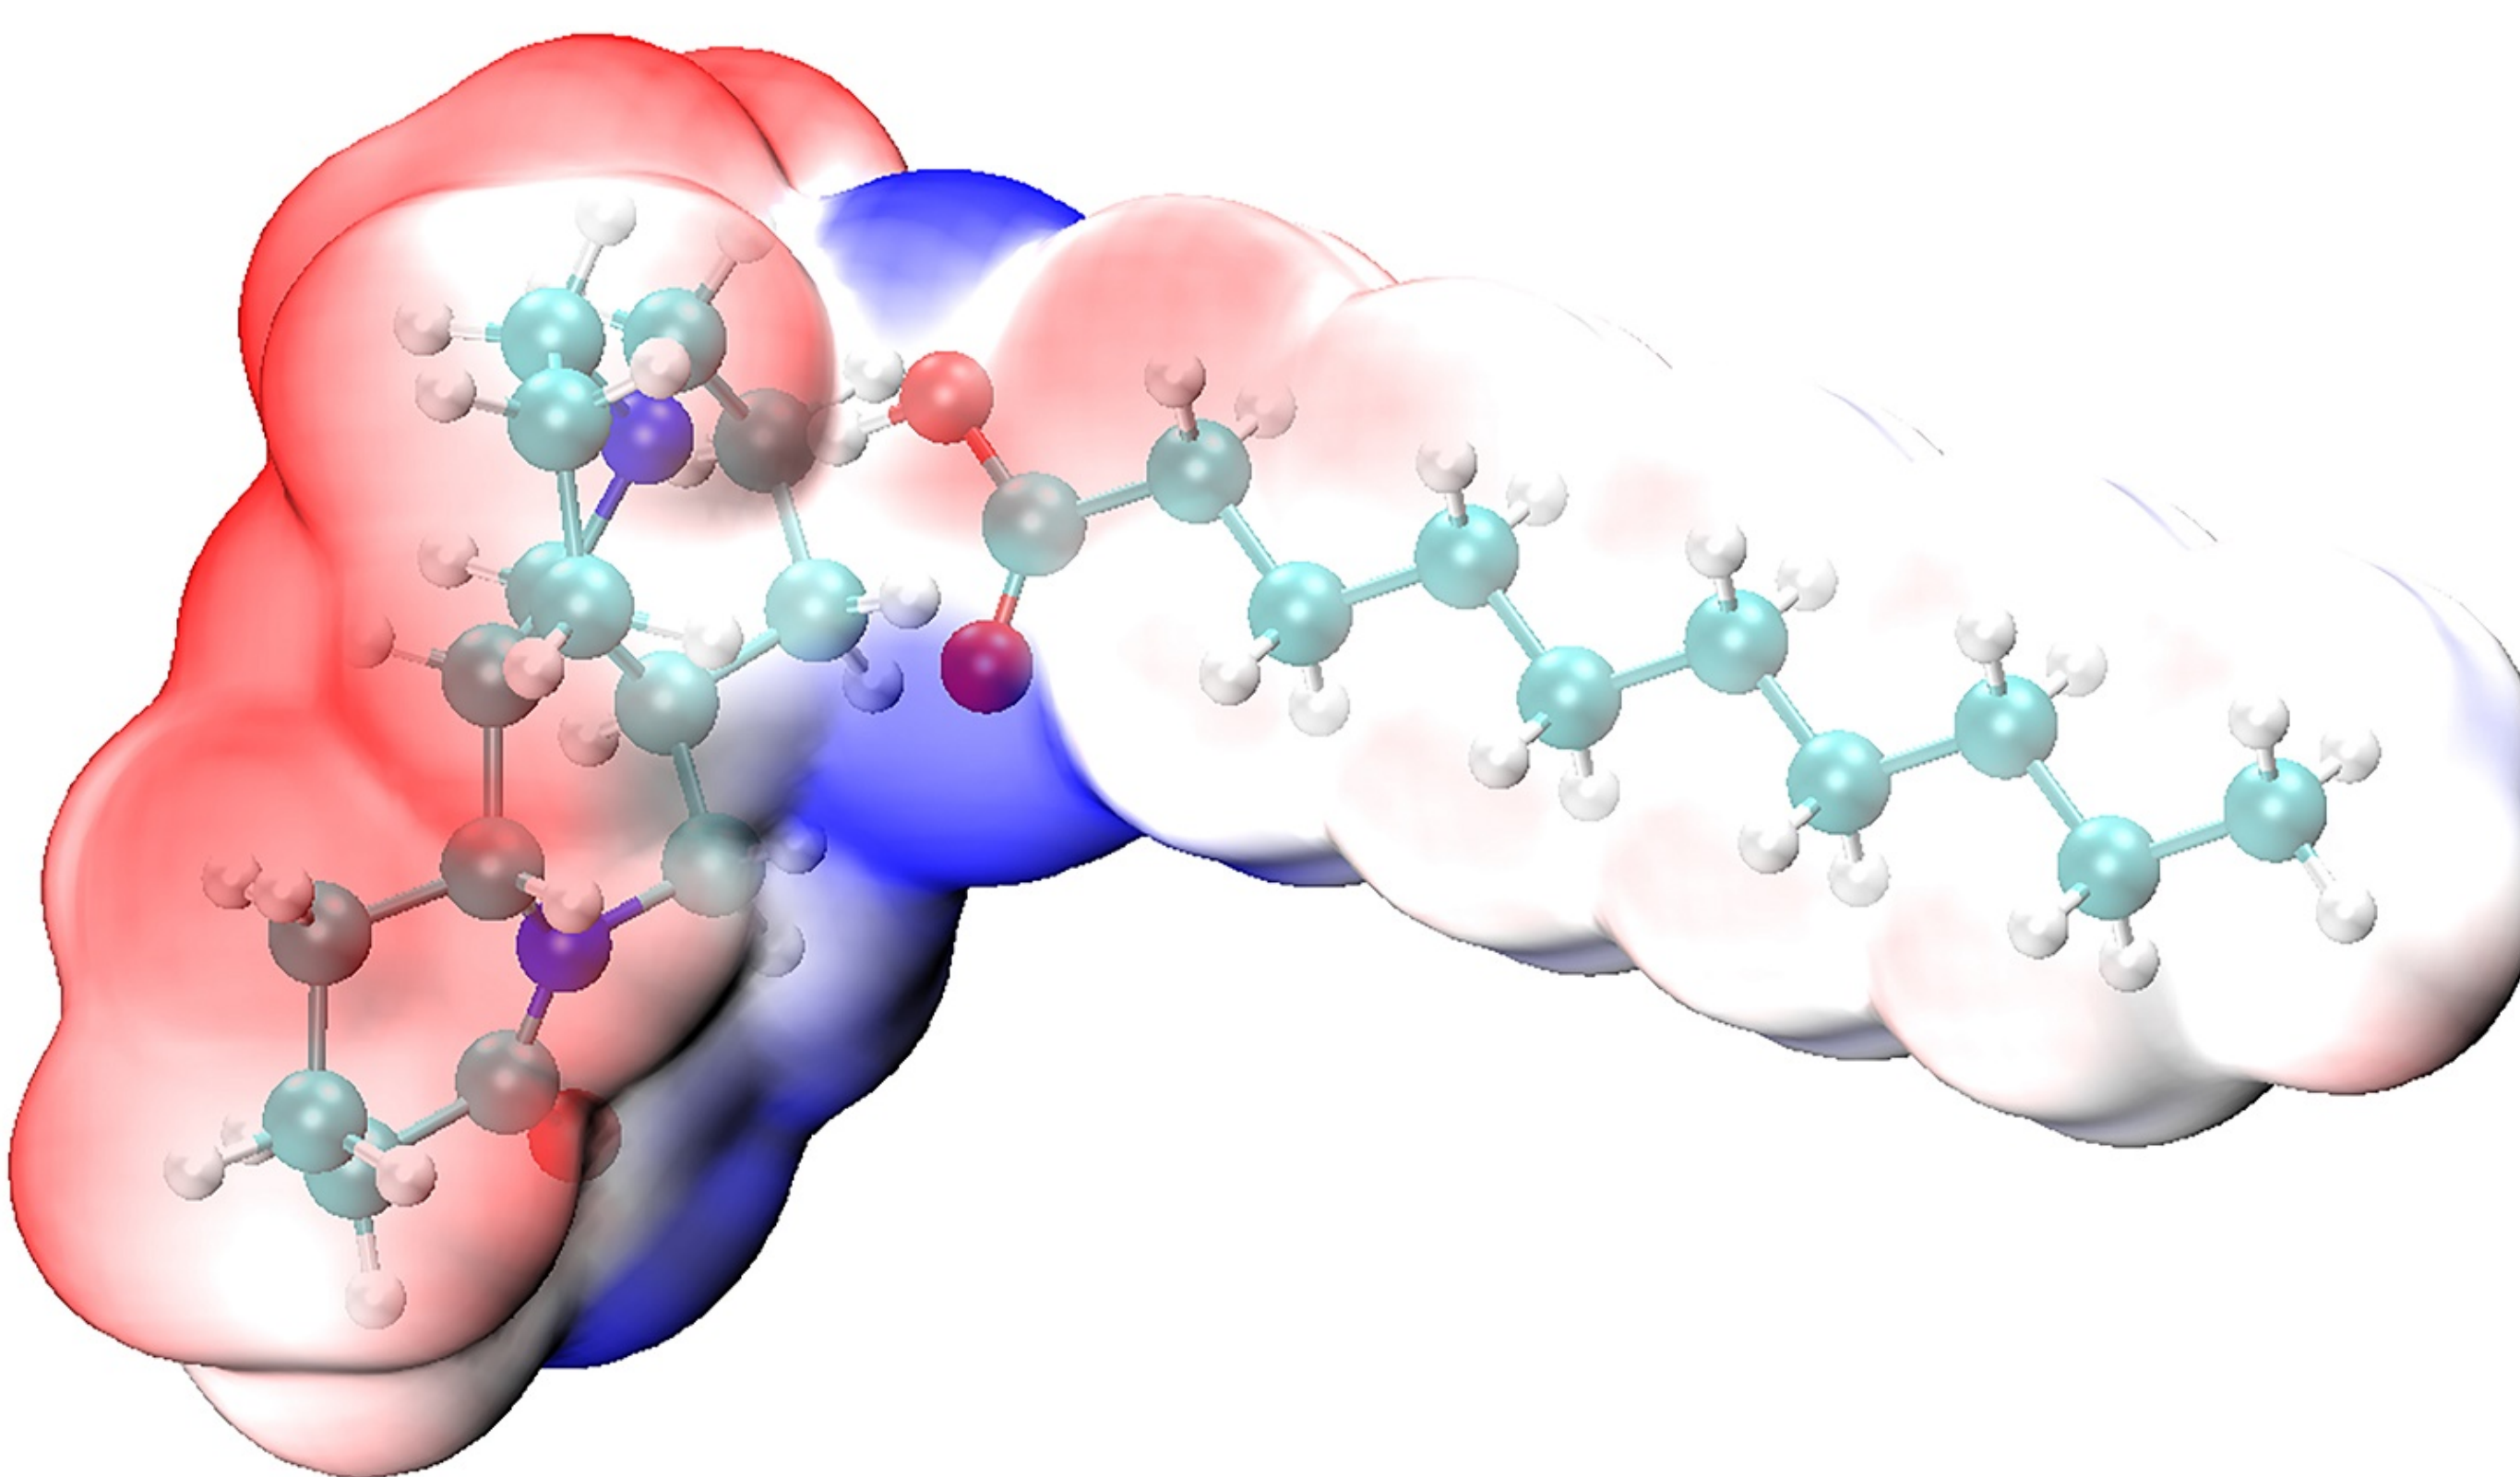

[Mat][C10]

ESP (kcal/mol):

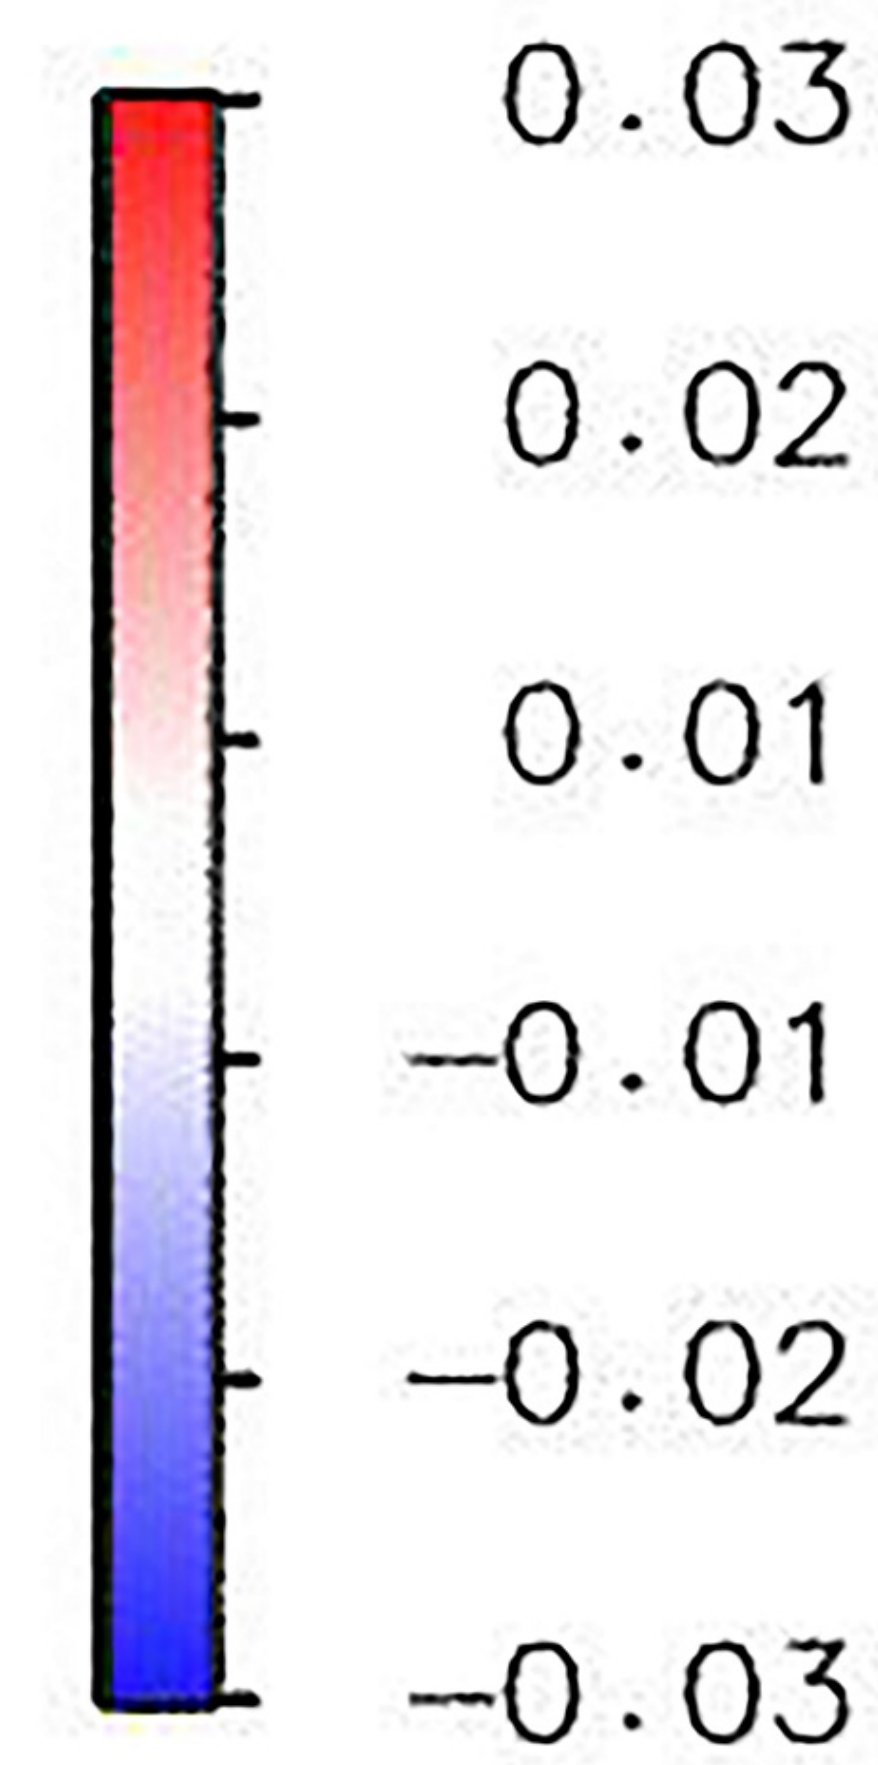

Supplement: d1nj02859f2.pdf [file d1nj02859f2.pdf]

HOMO

LUMO

[Mat][C12]

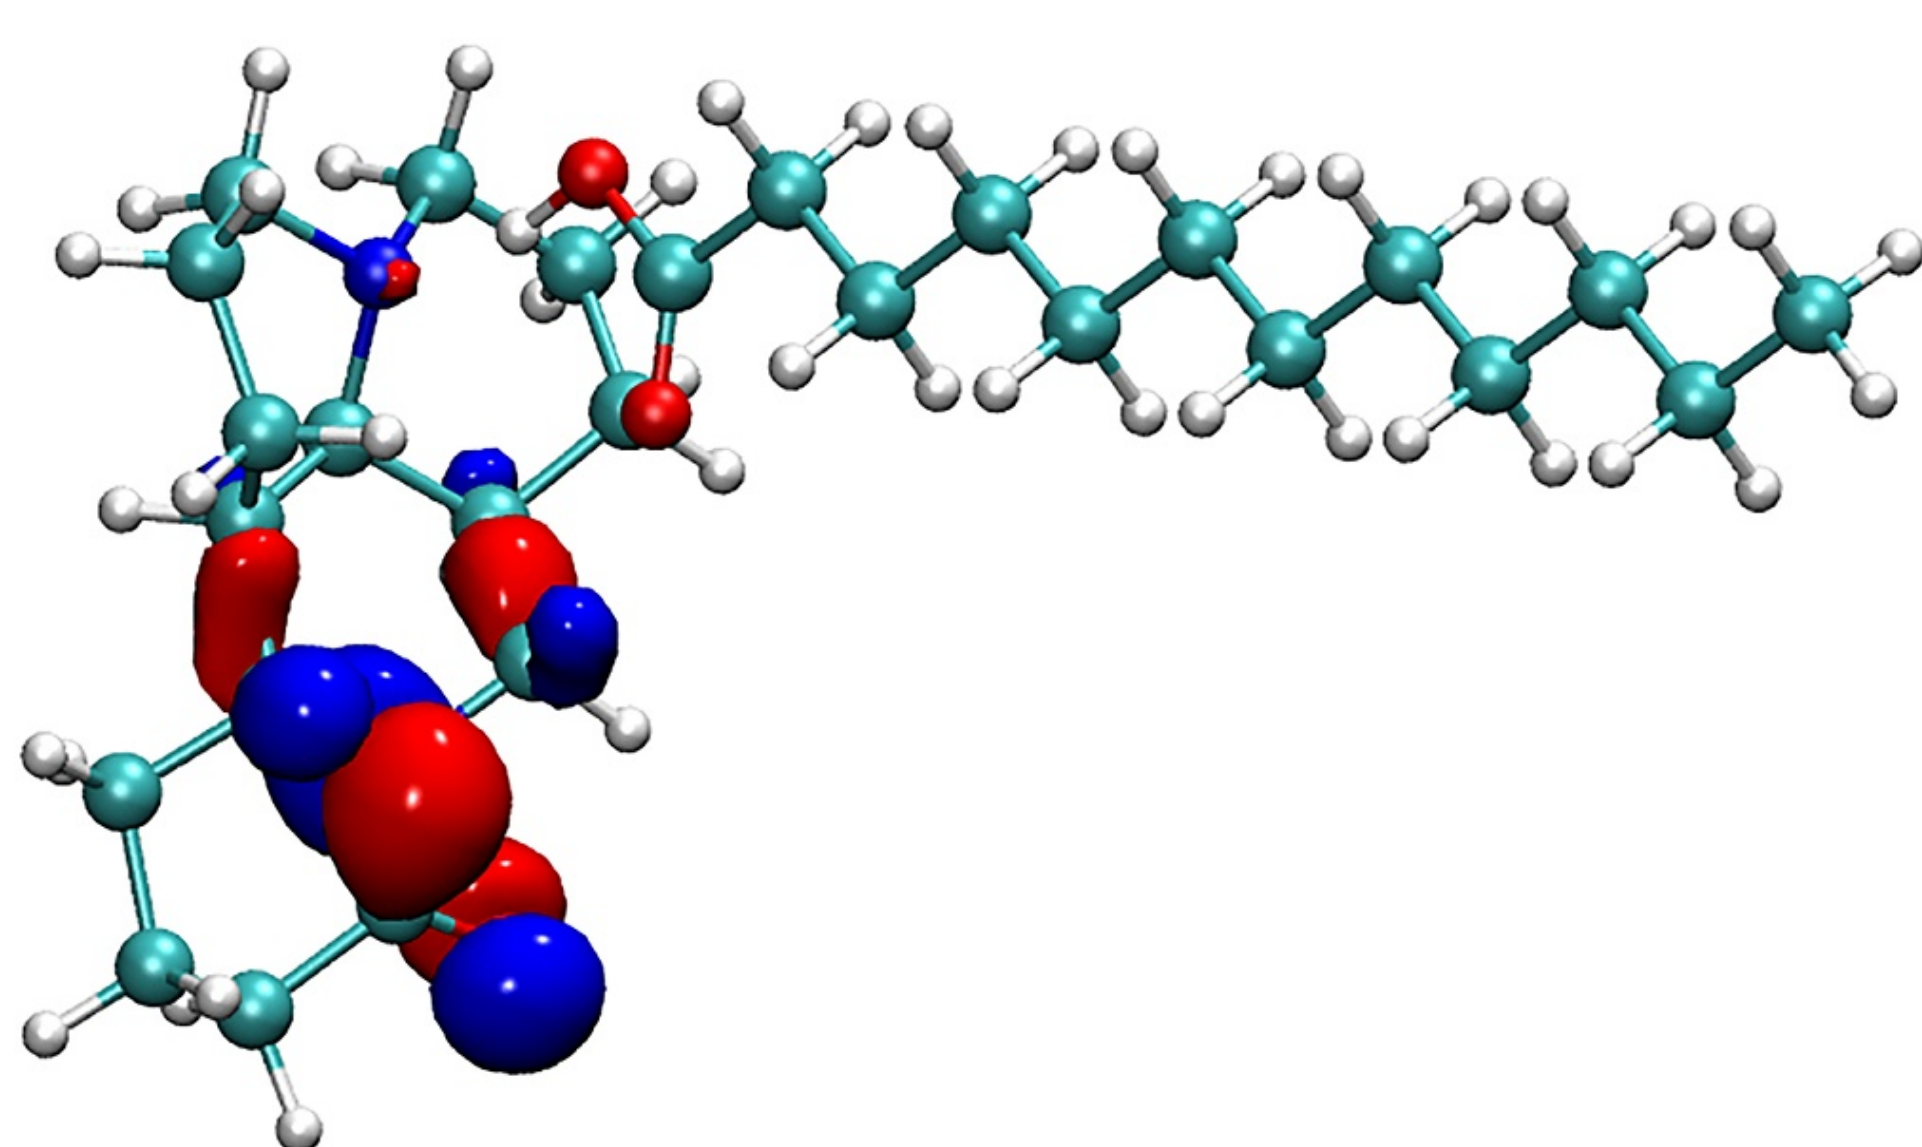

-0.22914

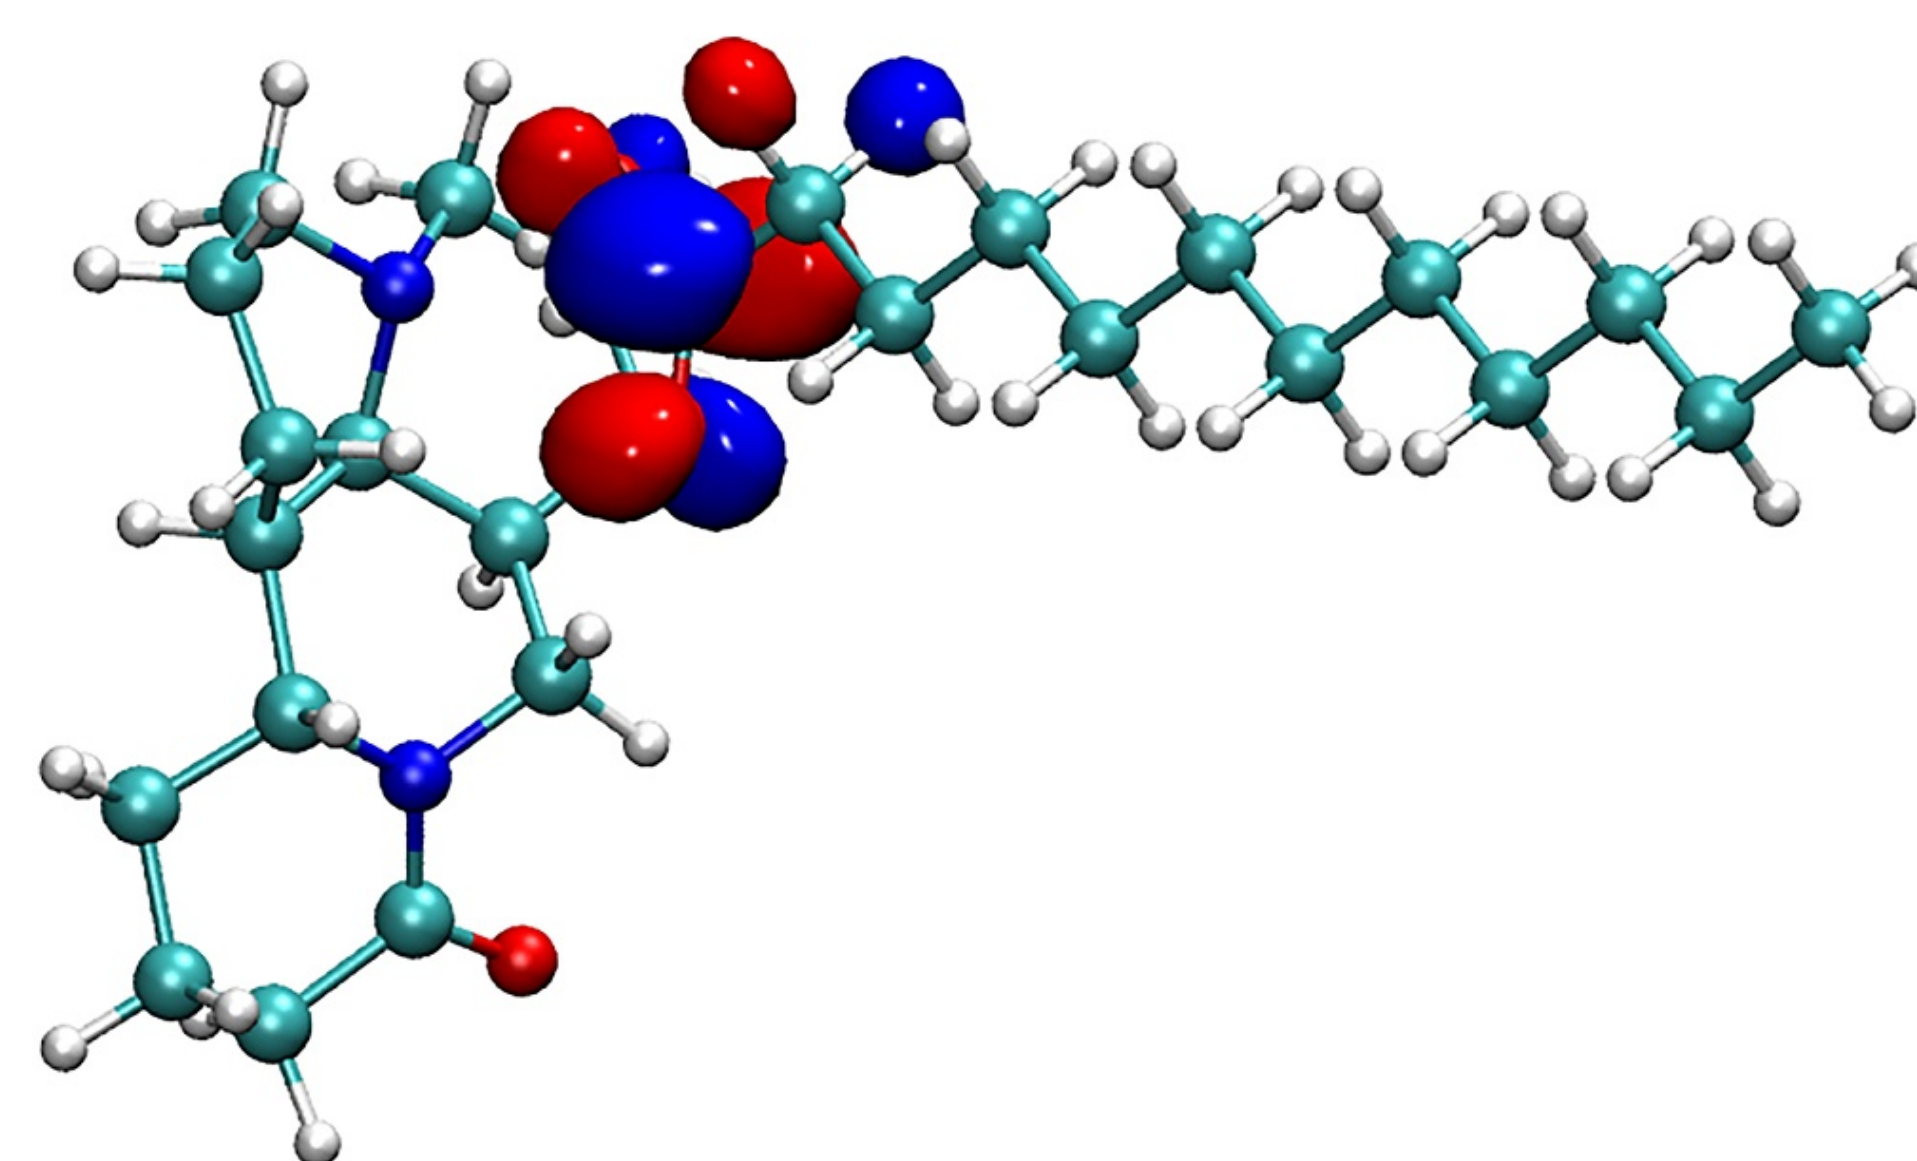

0.01242

[Mat][C10]

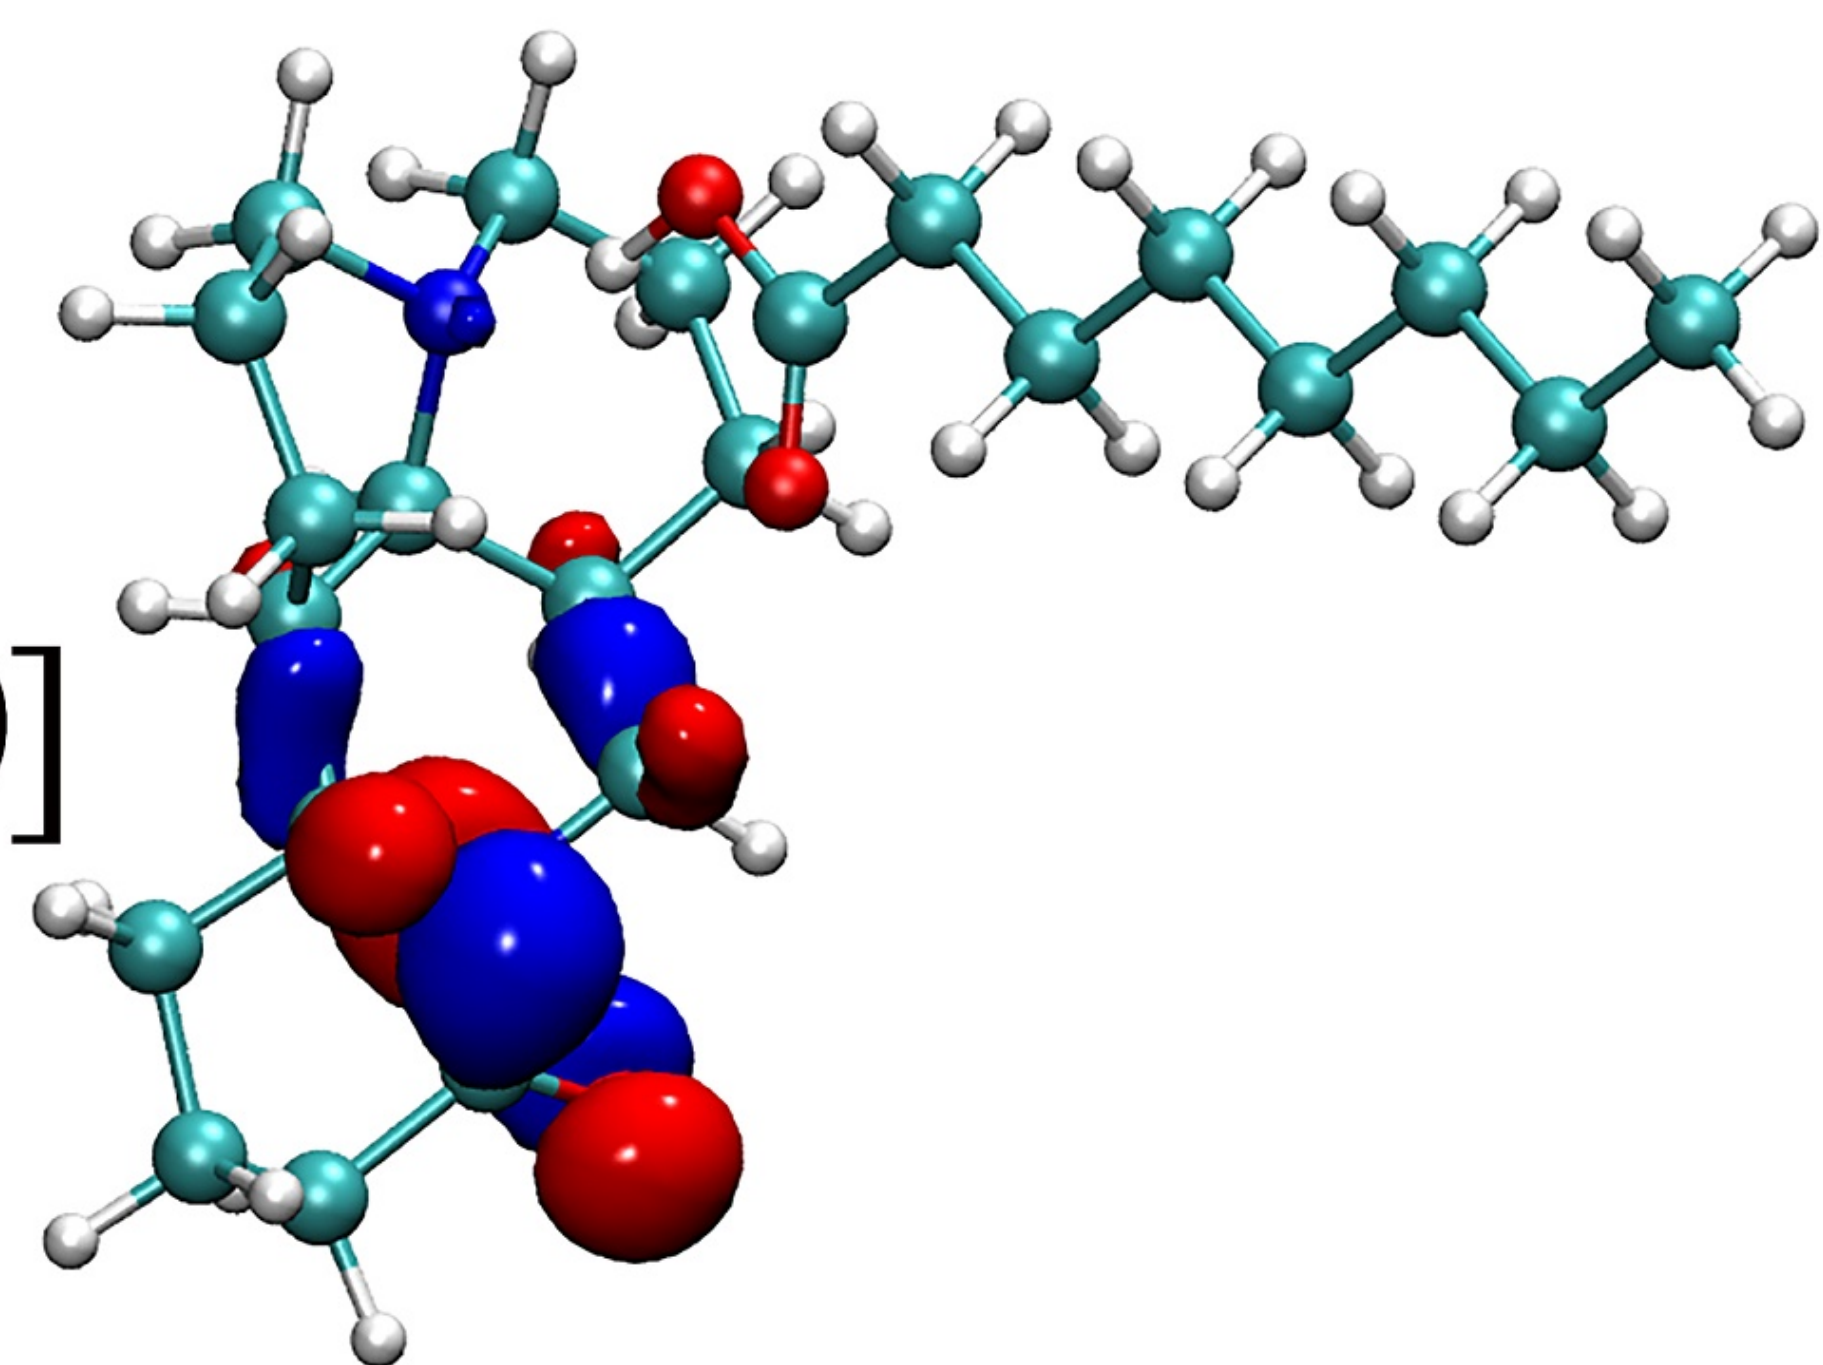

-0.22914

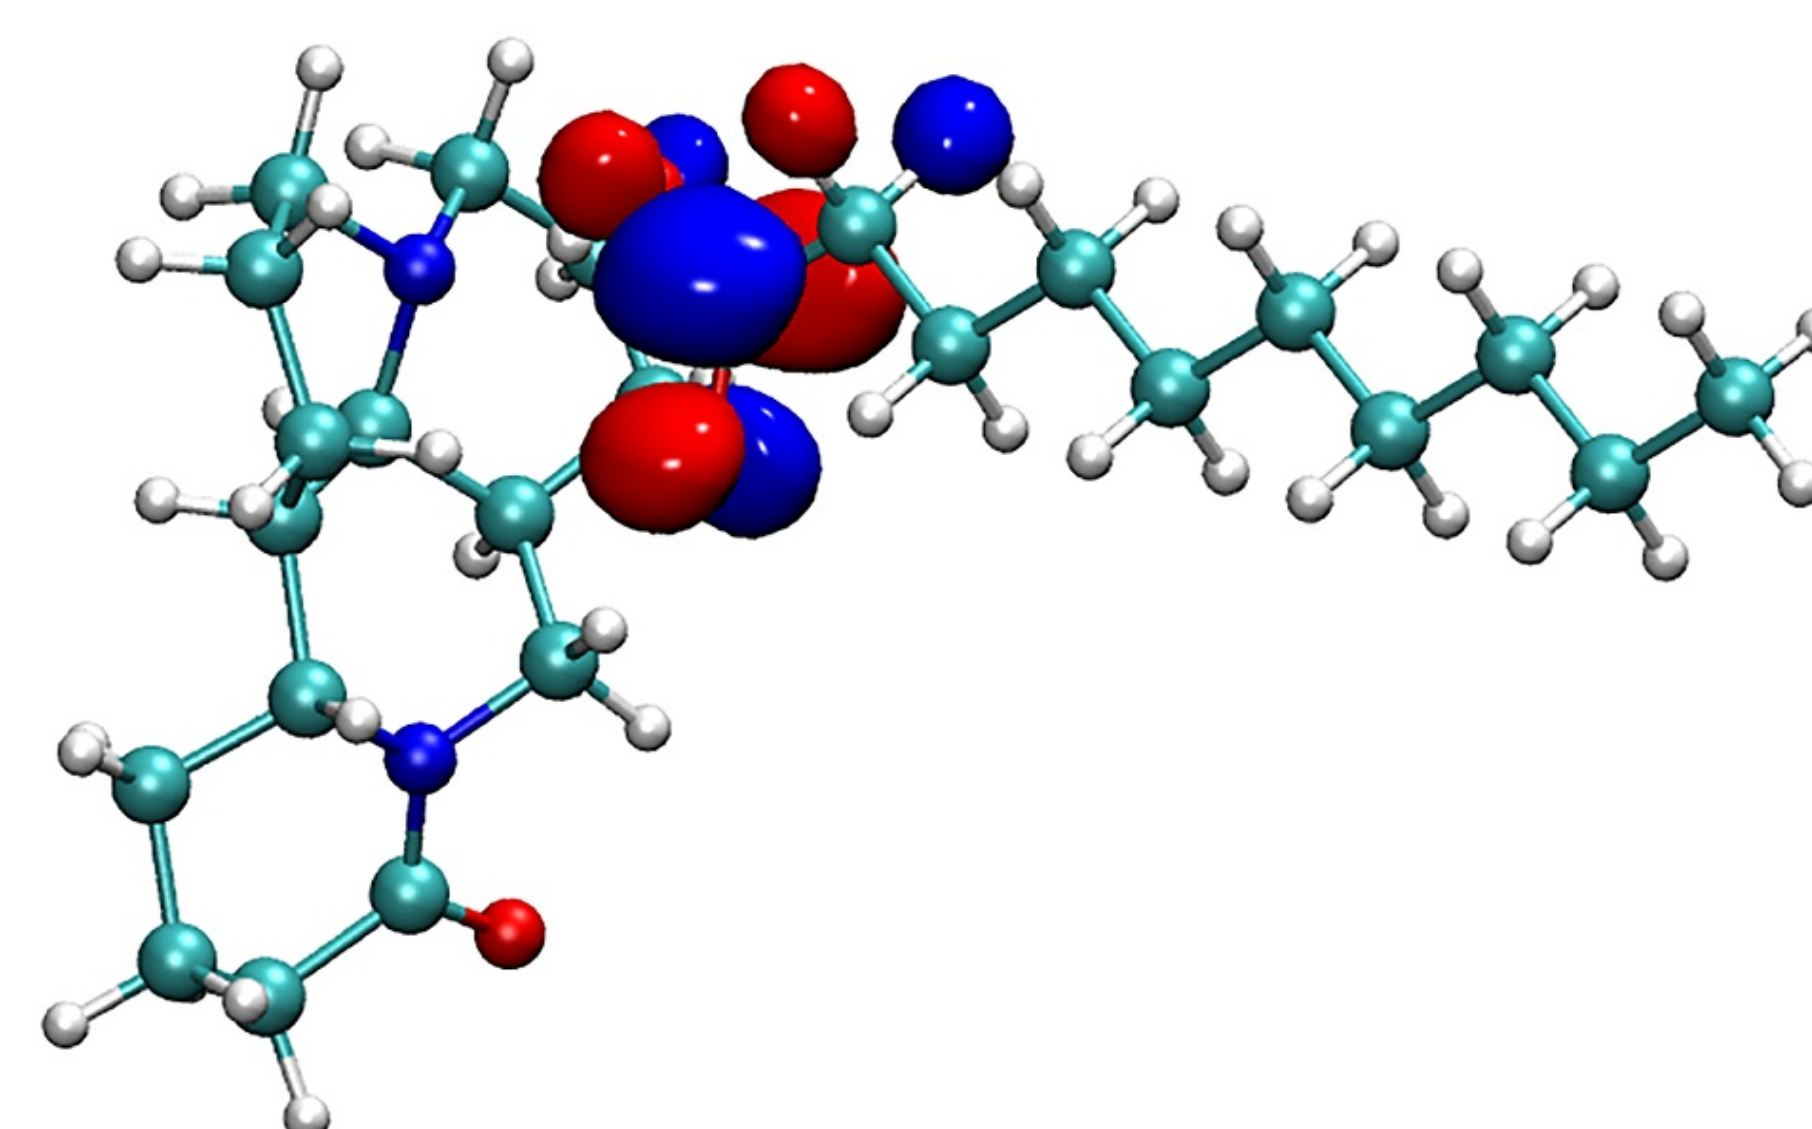

0.01245

[Mat][C8]

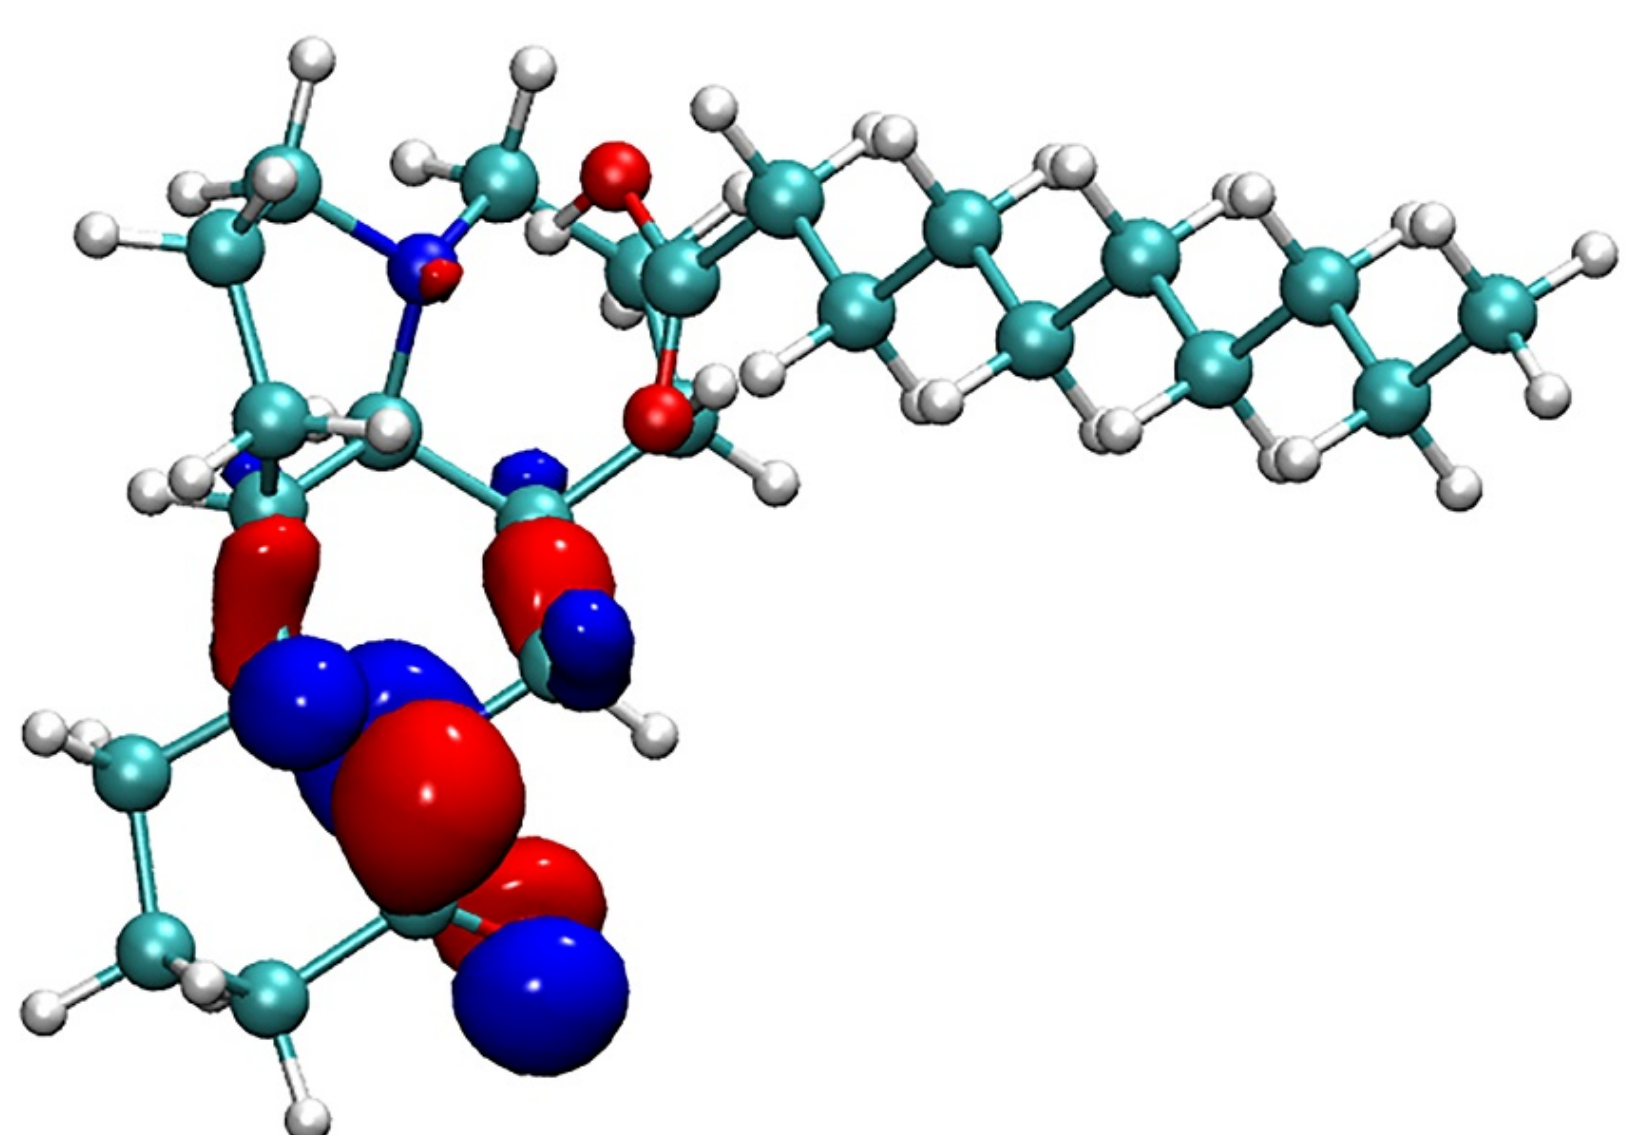

-0.22912

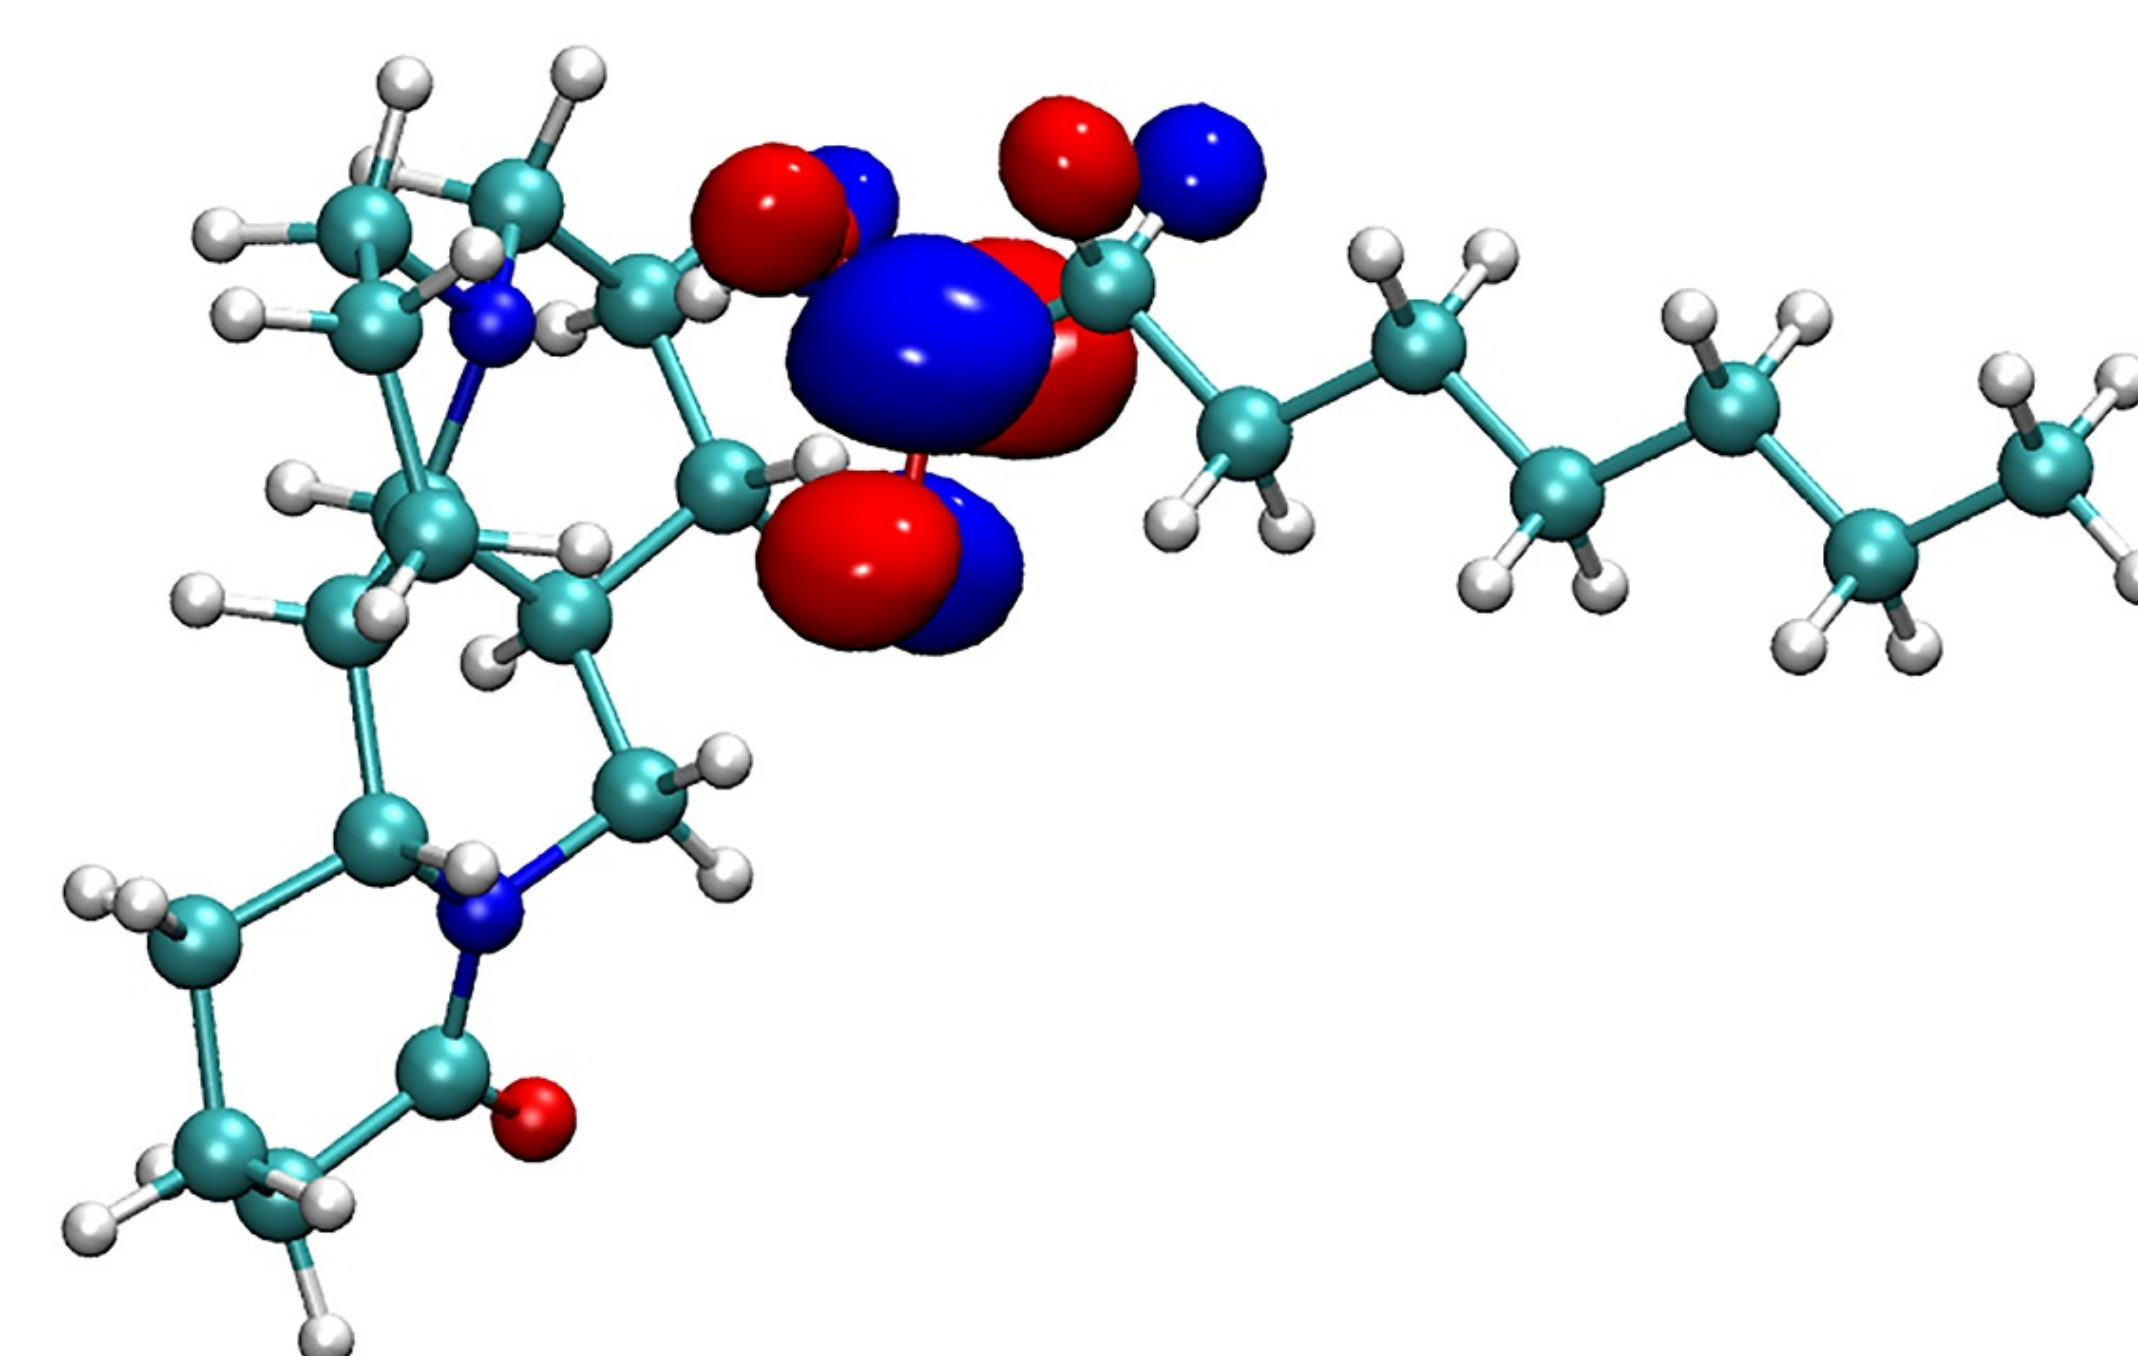

0.01233

Supplement: d1nj02859f3.pdf [file d1nj02859f3.pdf]

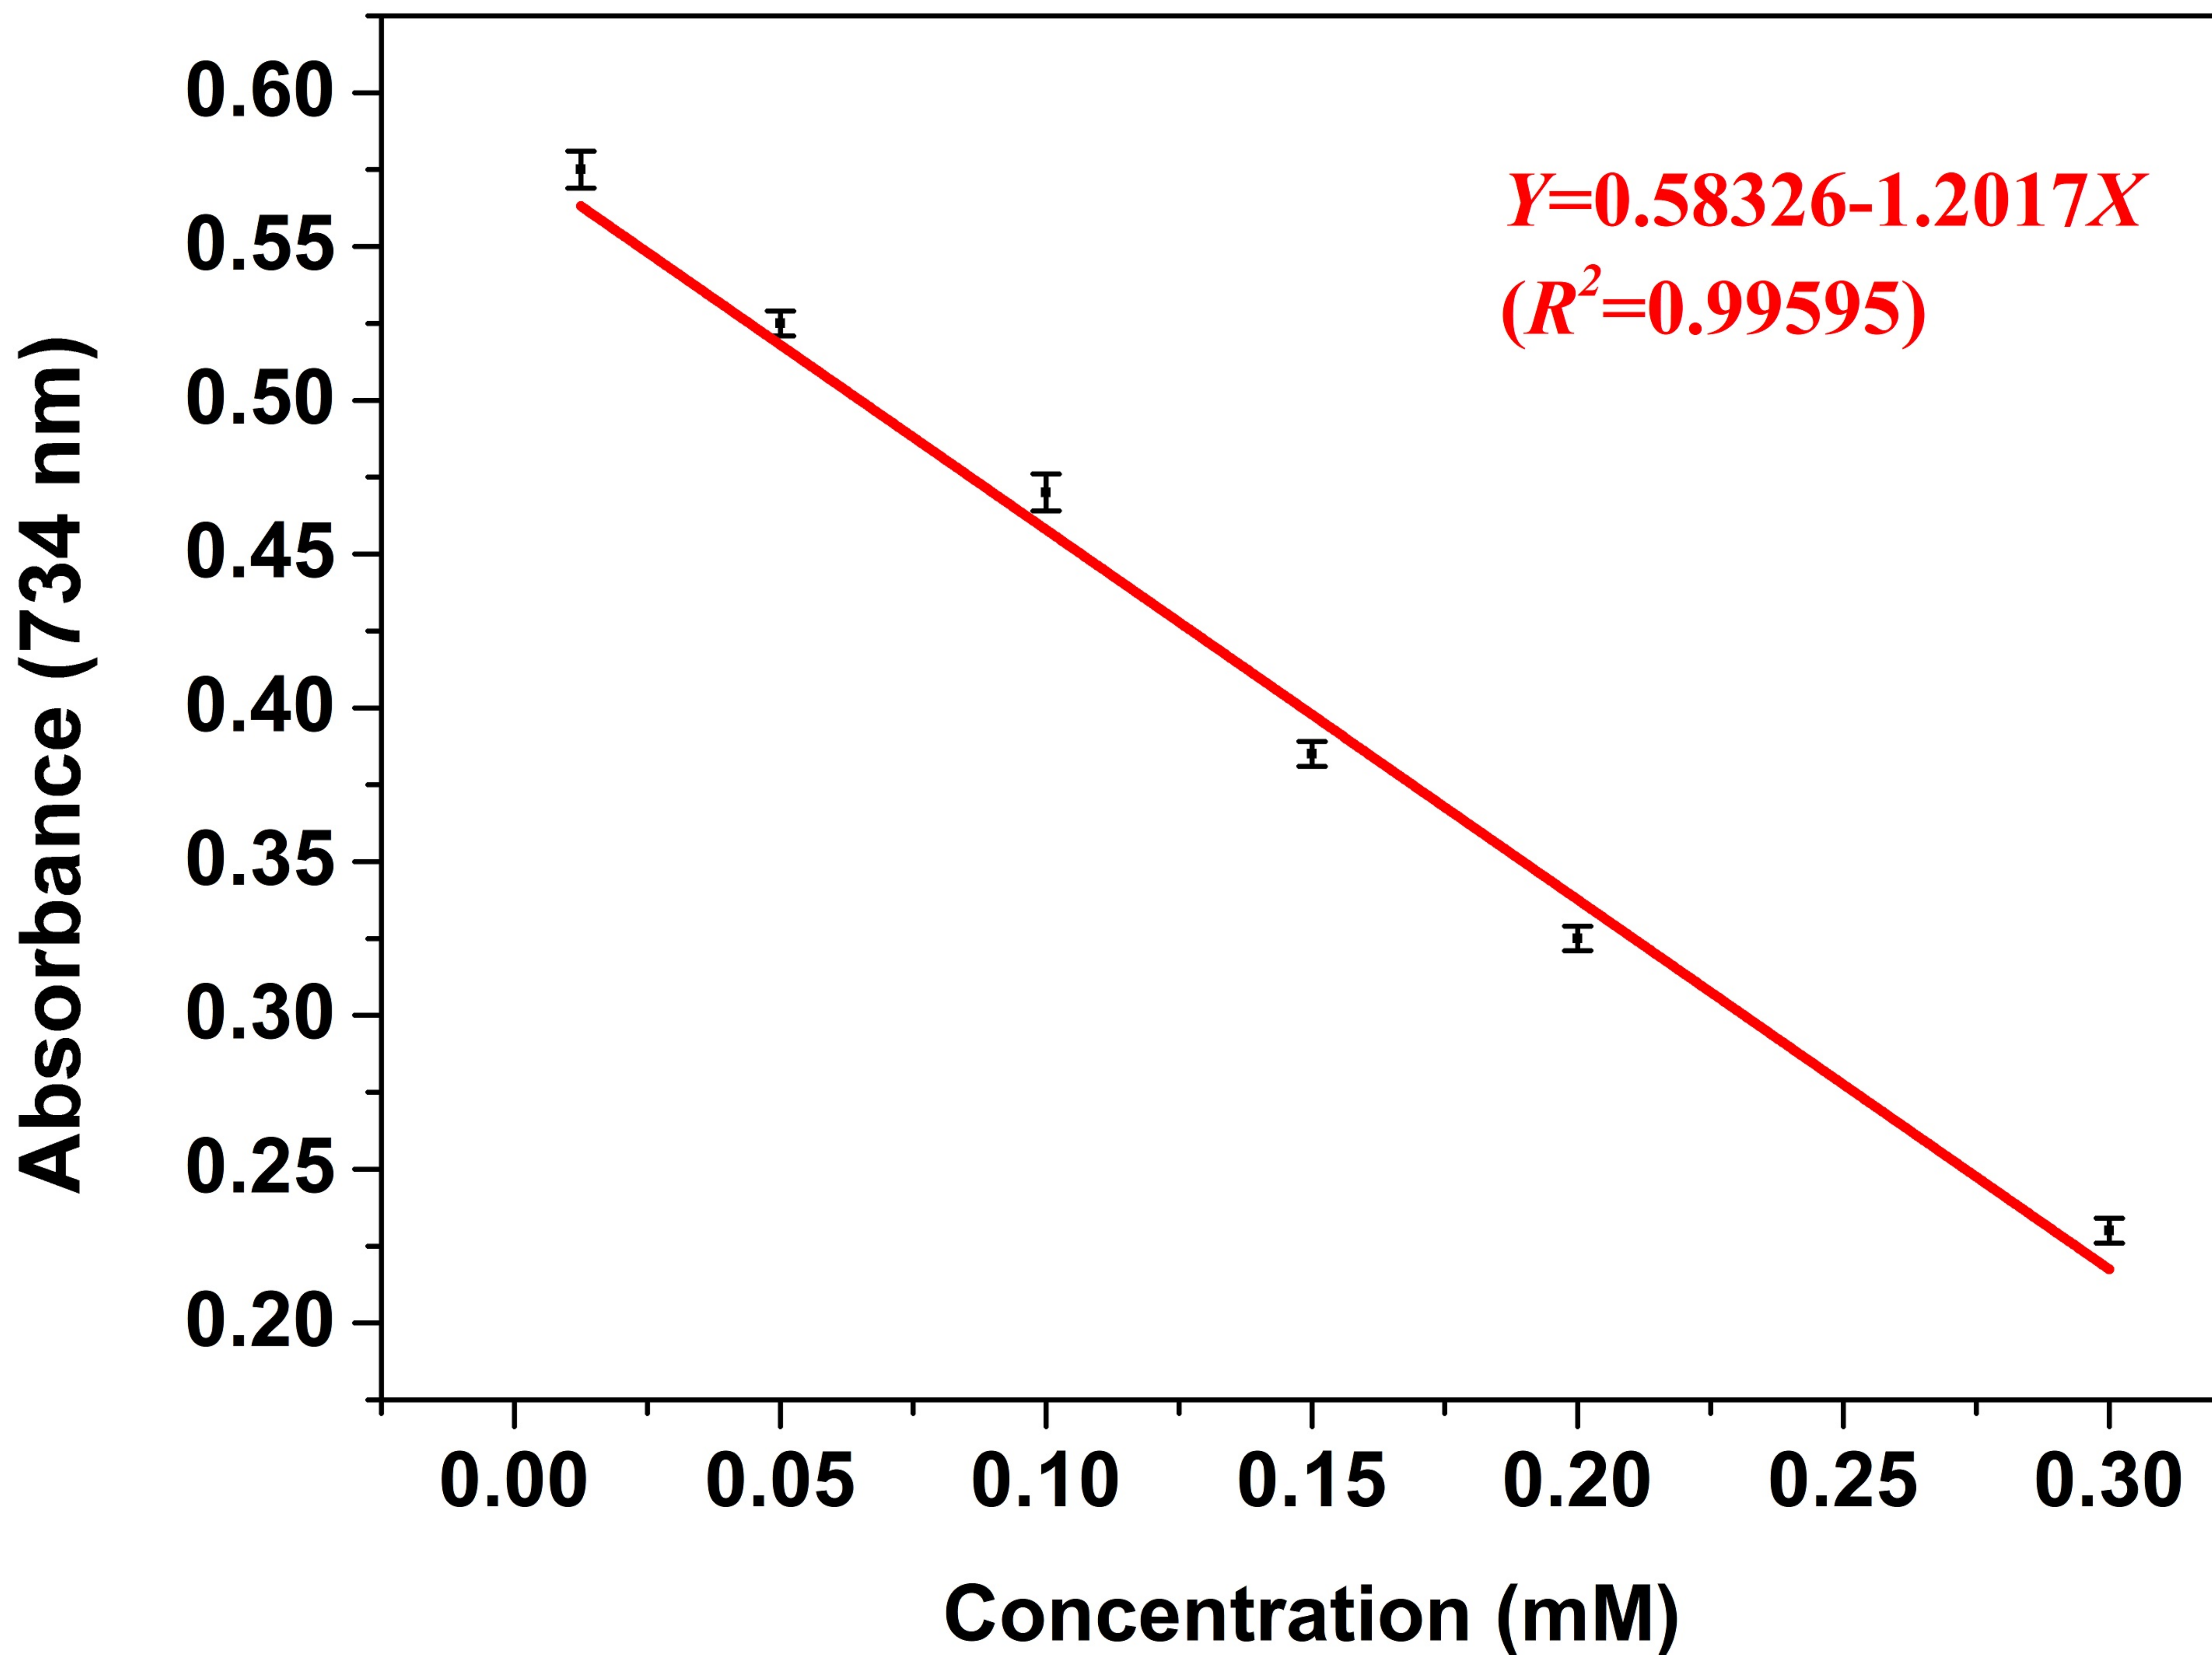

Supplement: d1nj02859f4.pdf [file d1nj02859f4.pdf]

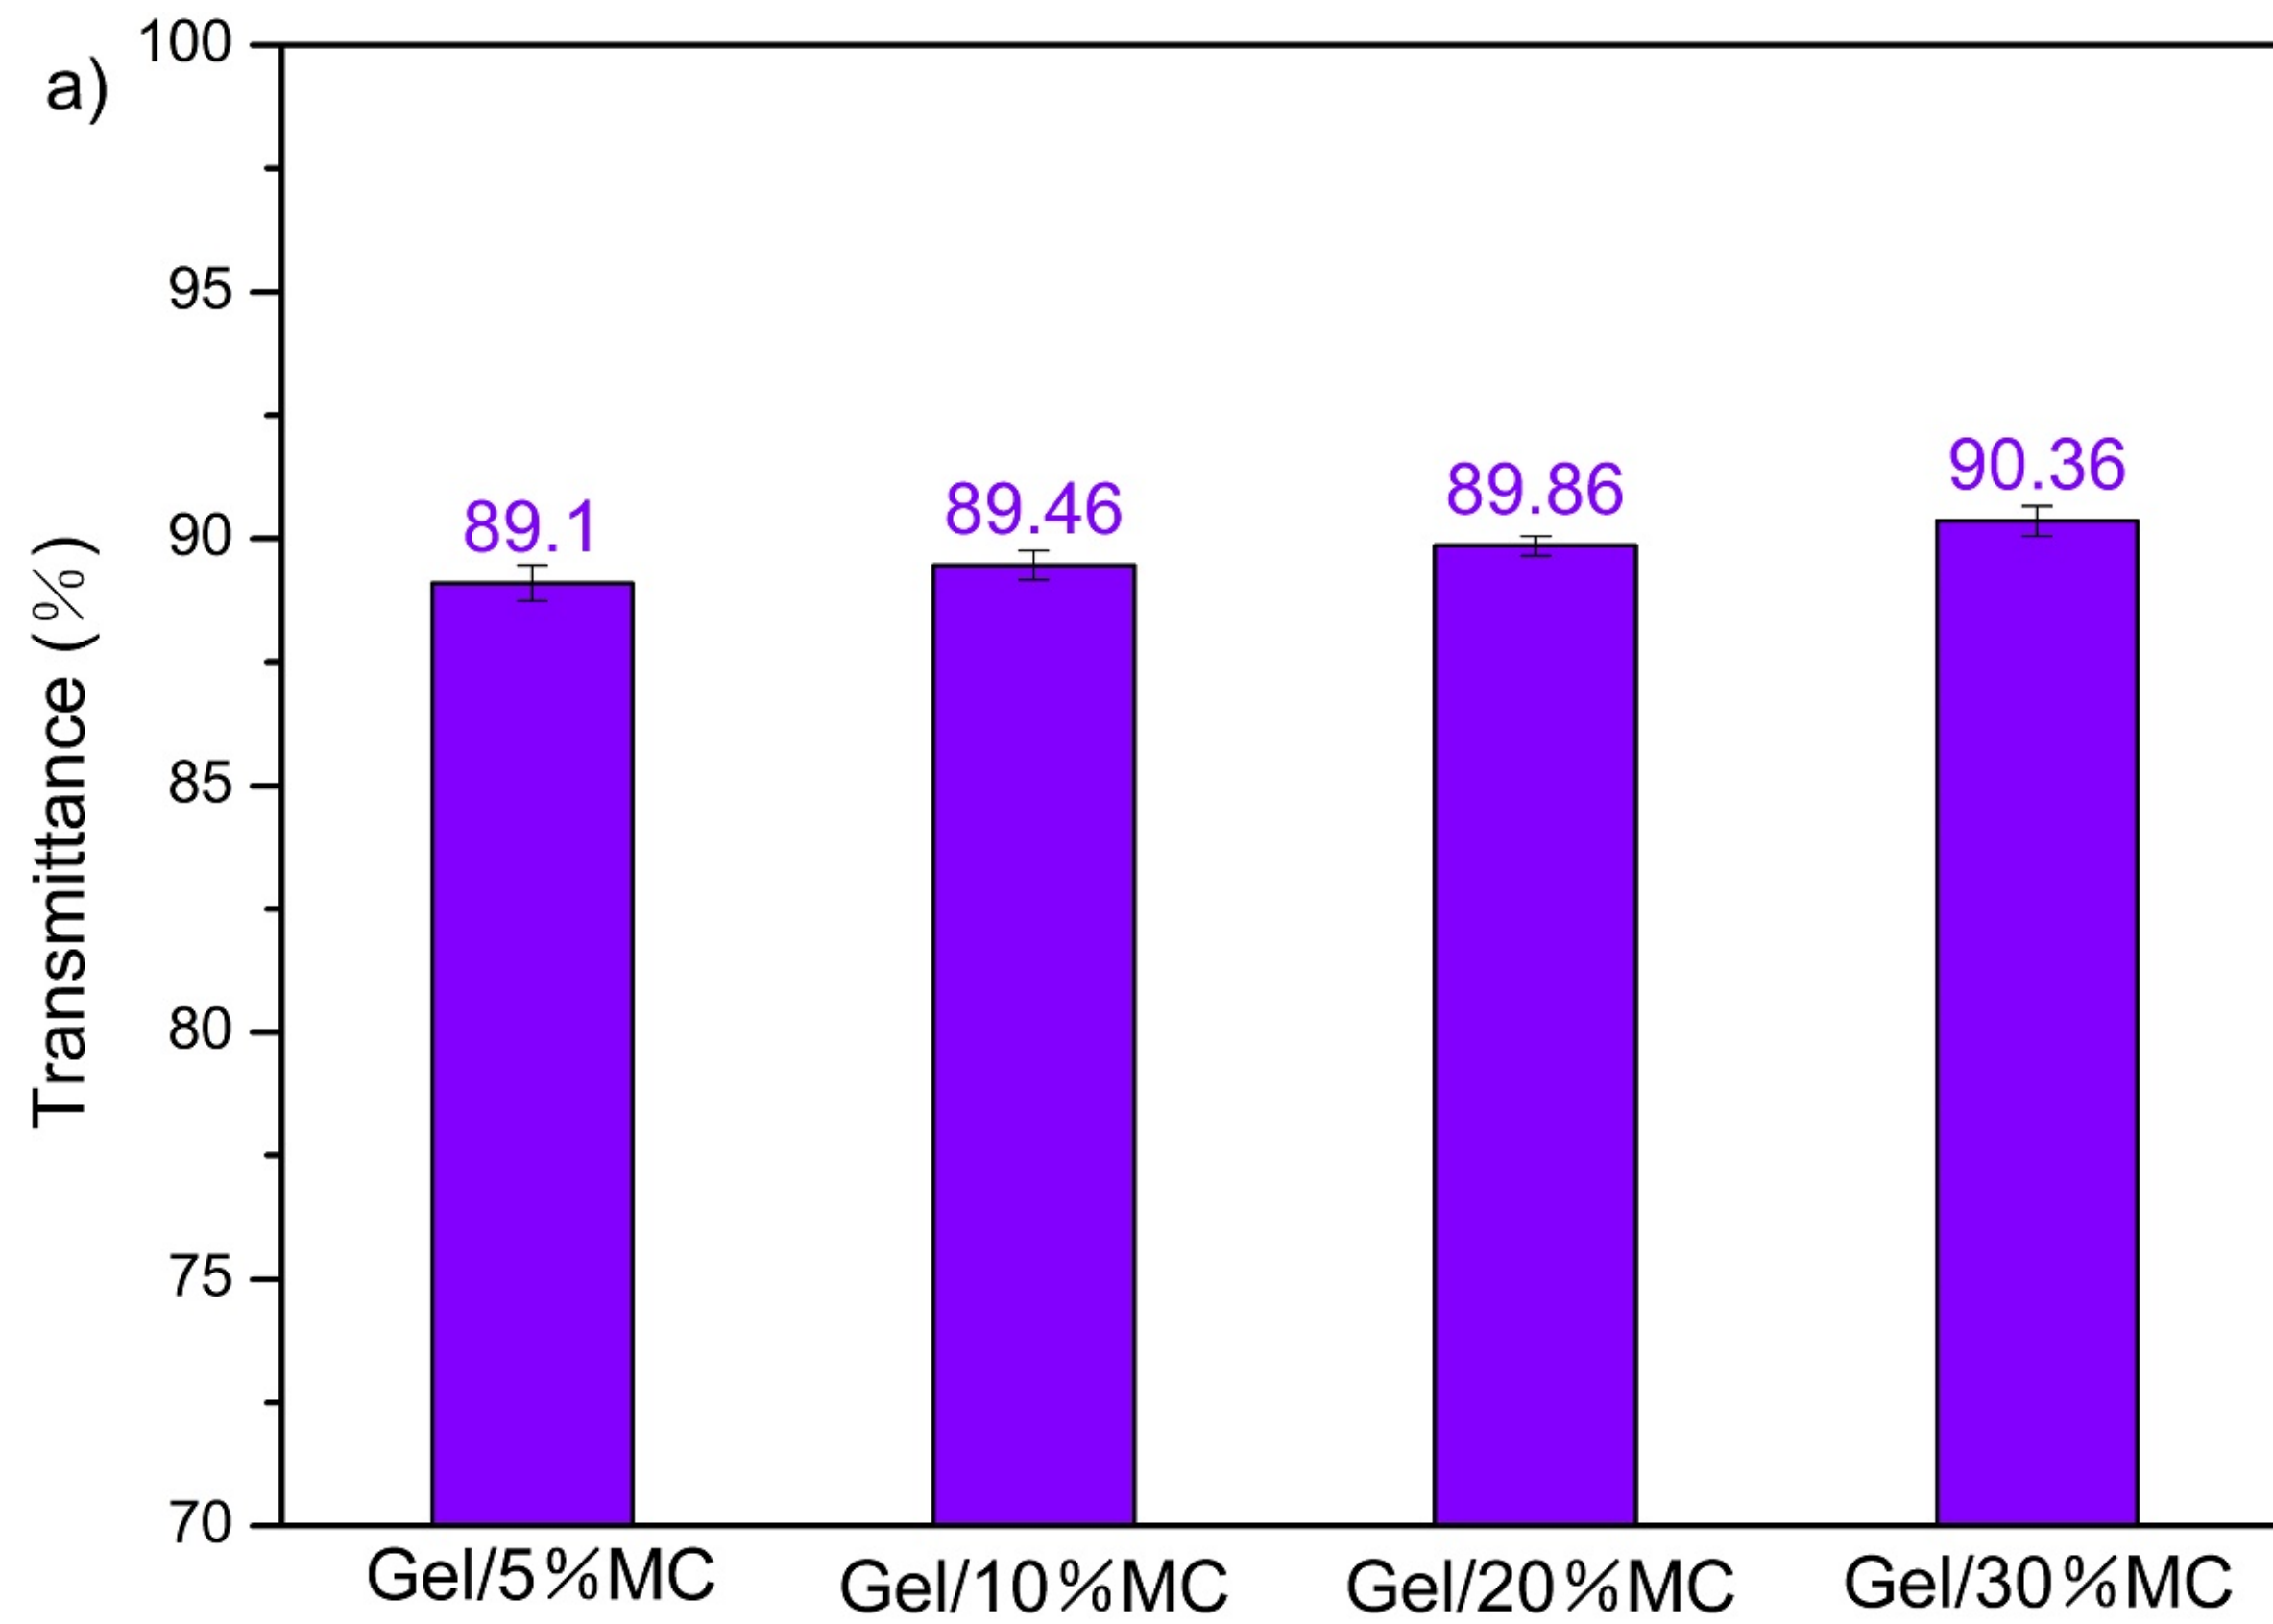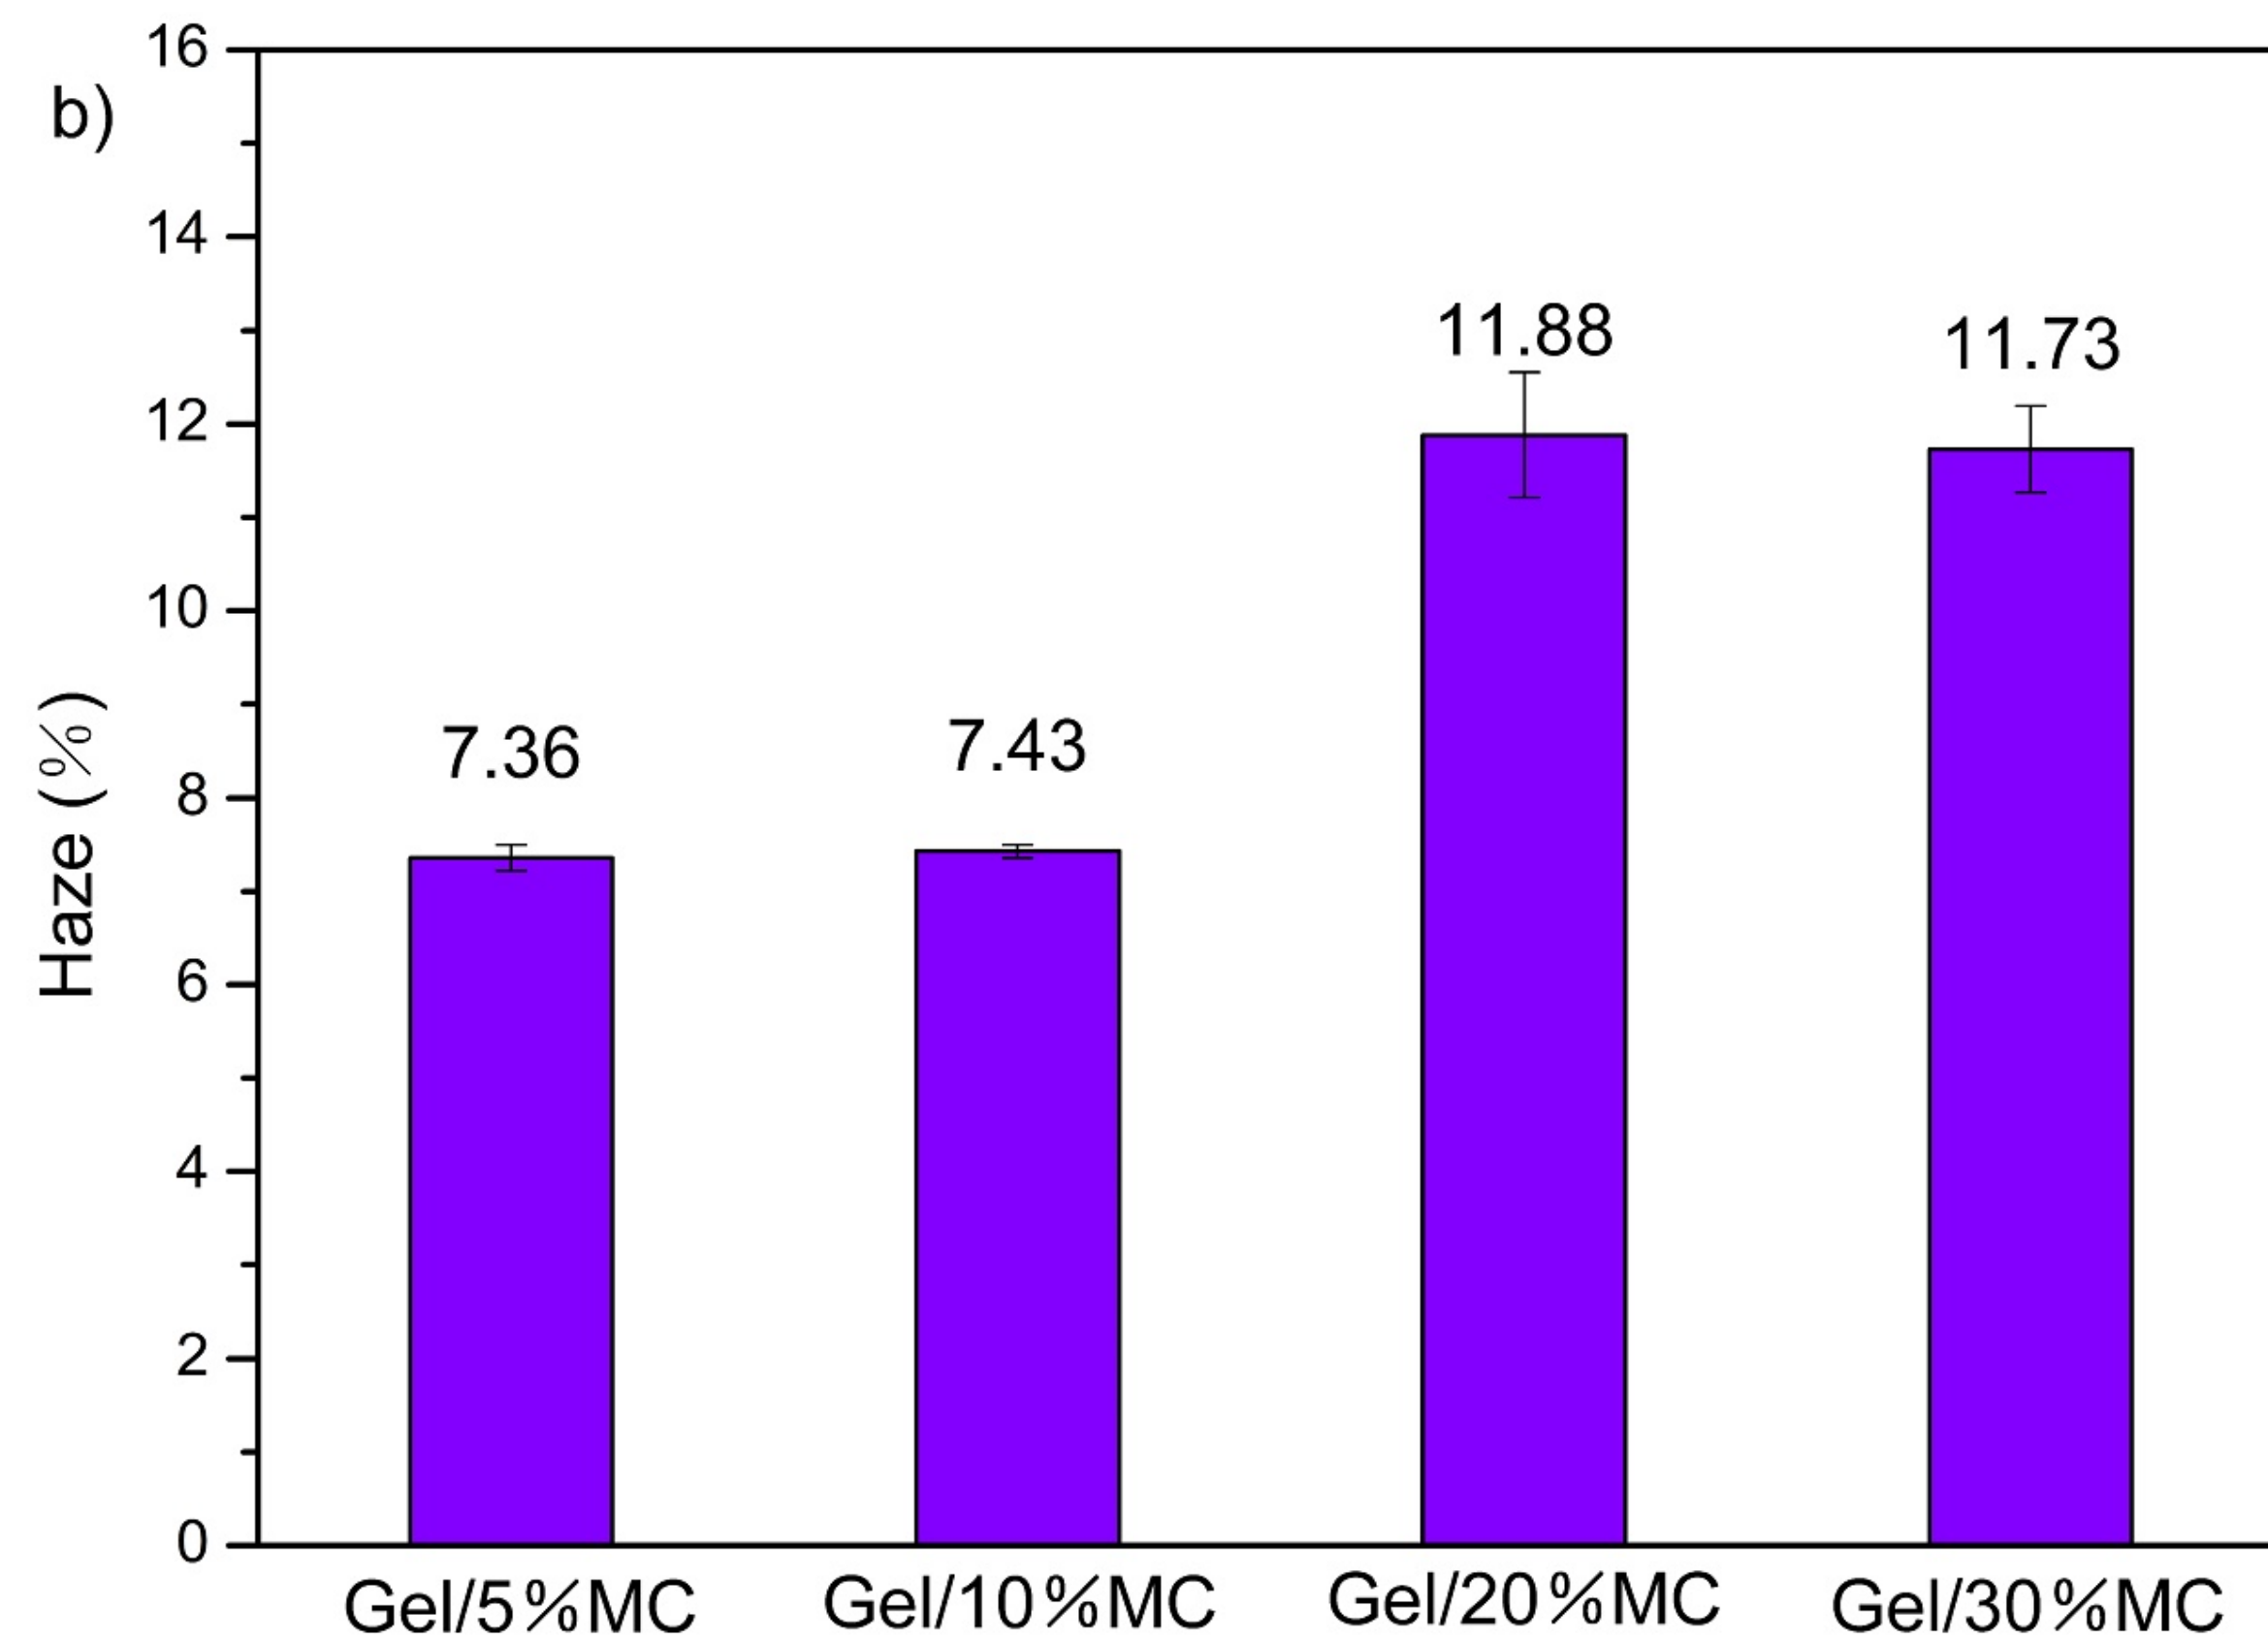

Supplement: d1nj02859f5.pdf [file d1nj02859f5.pdf]

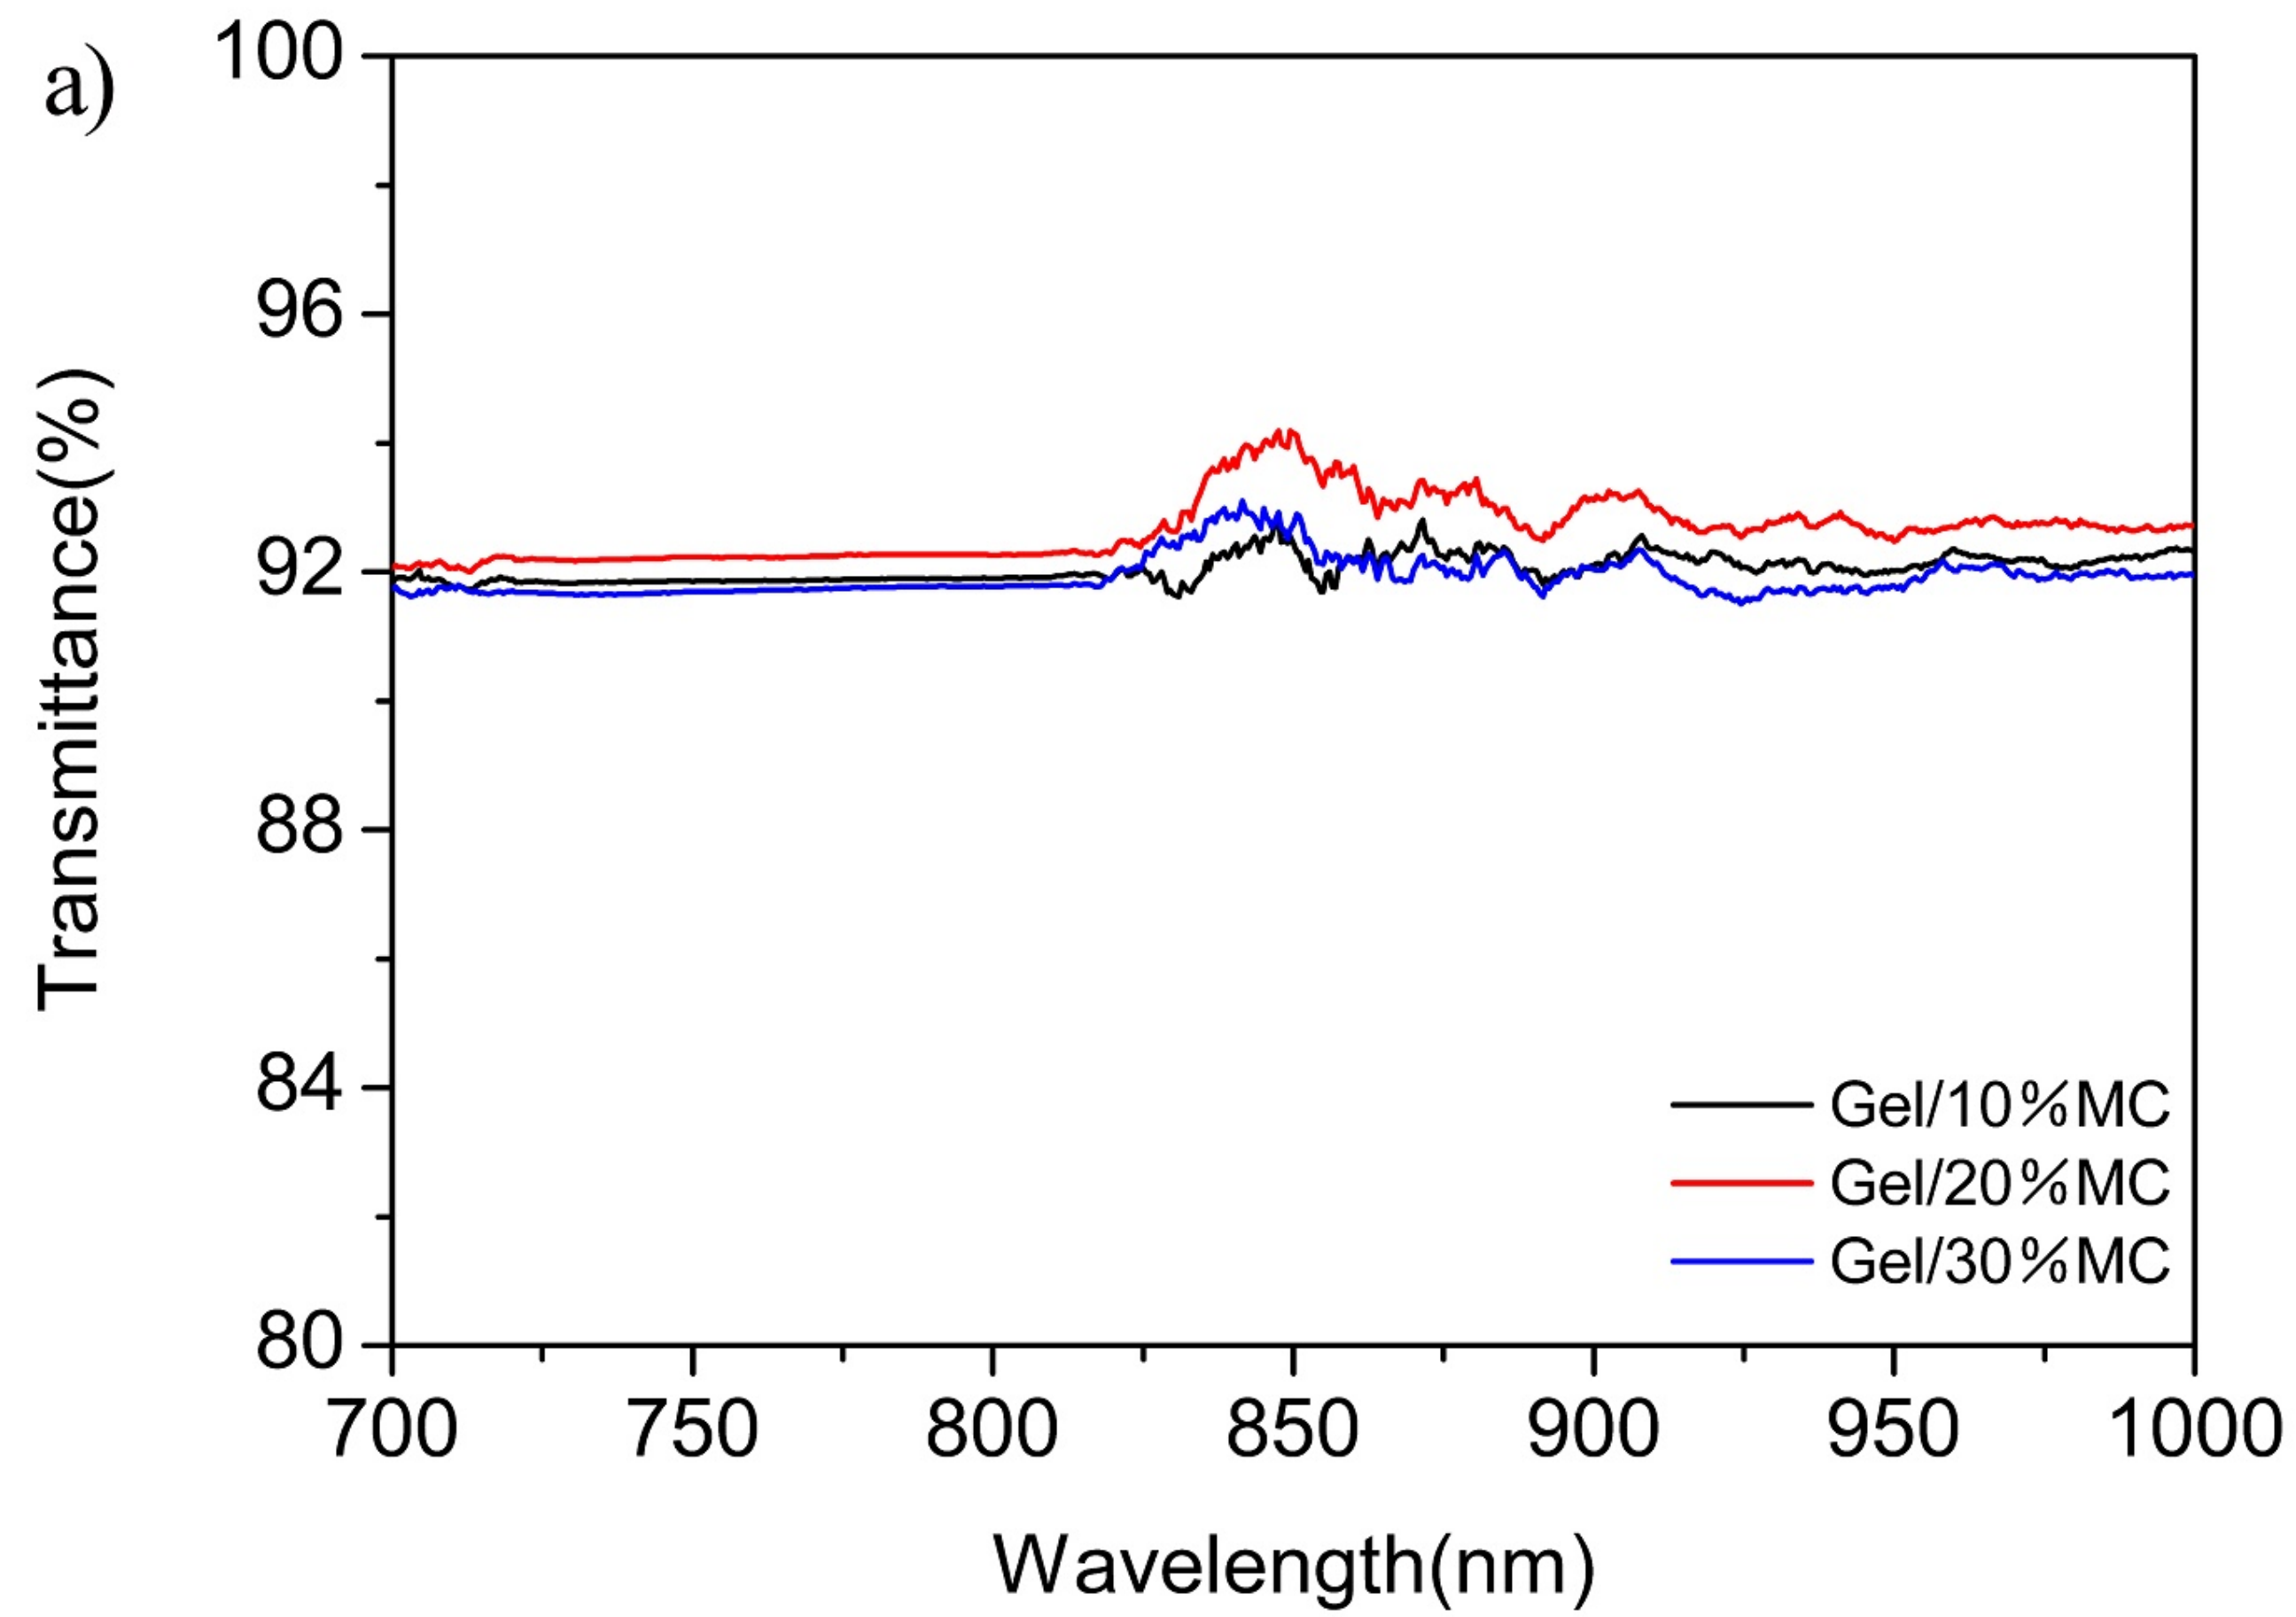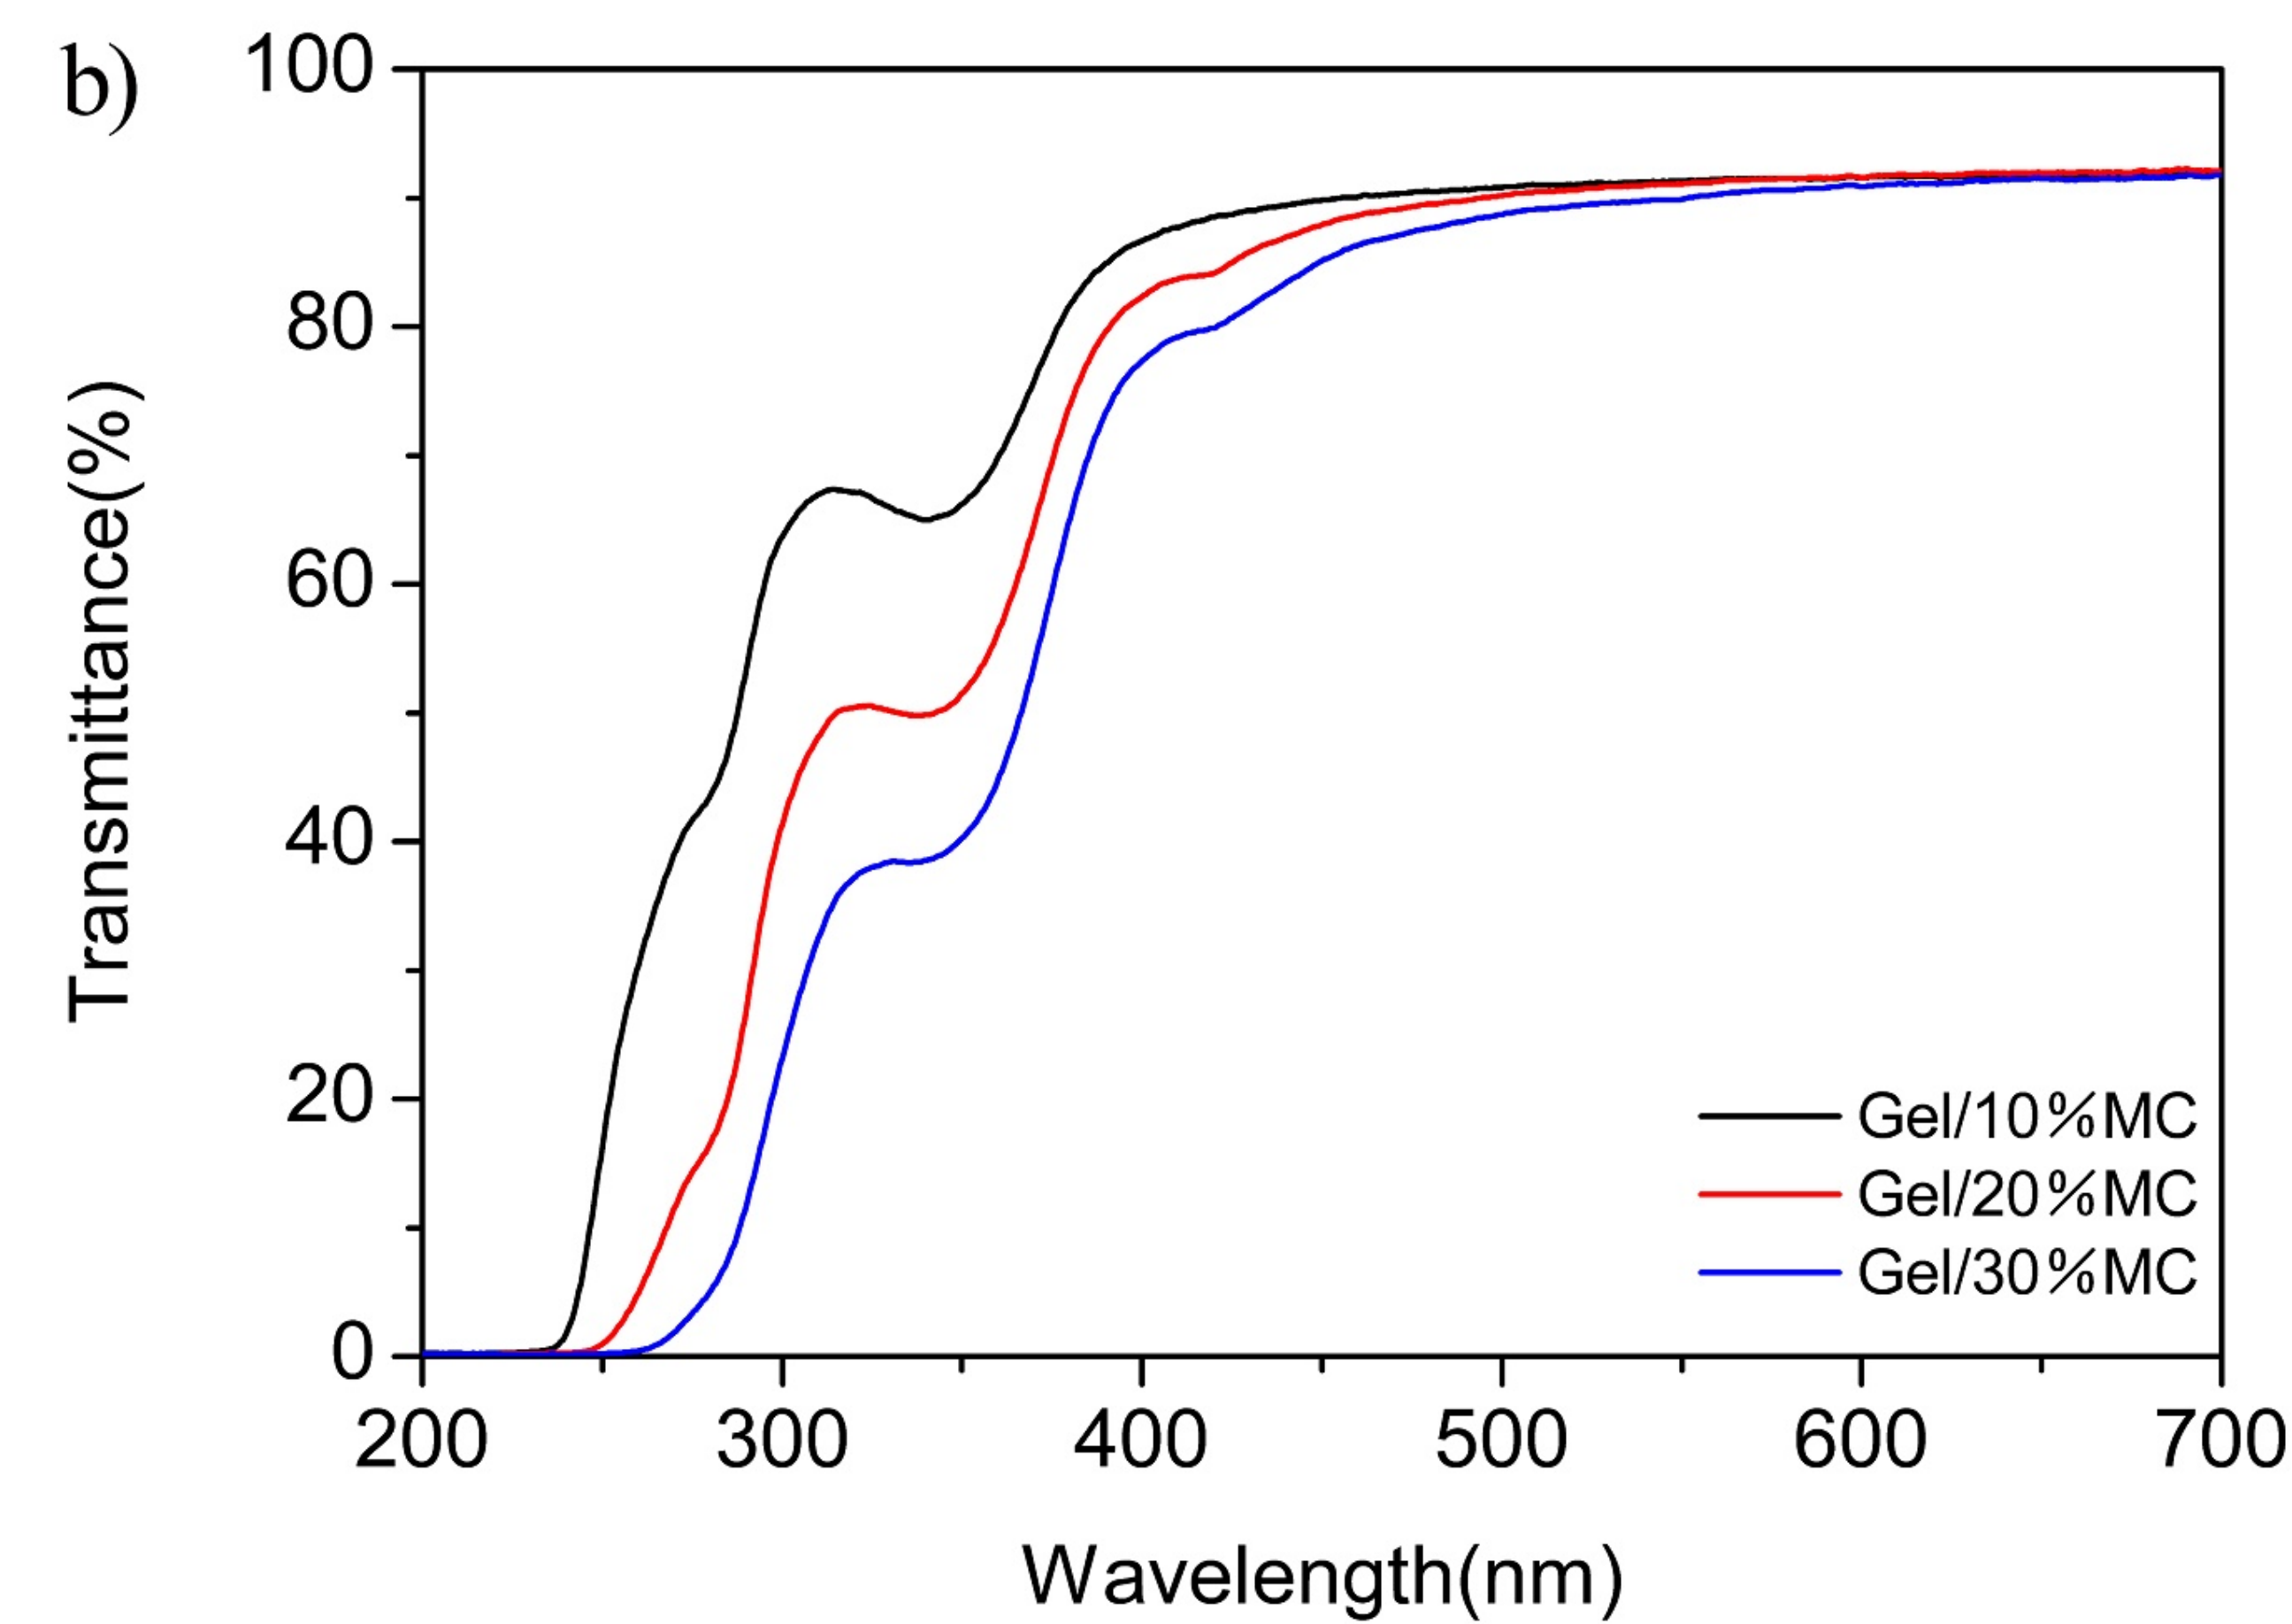

Supplement: d1nj02859f6.pdf [file d1nj02859f6.pdf]

Intensity (a.u.)

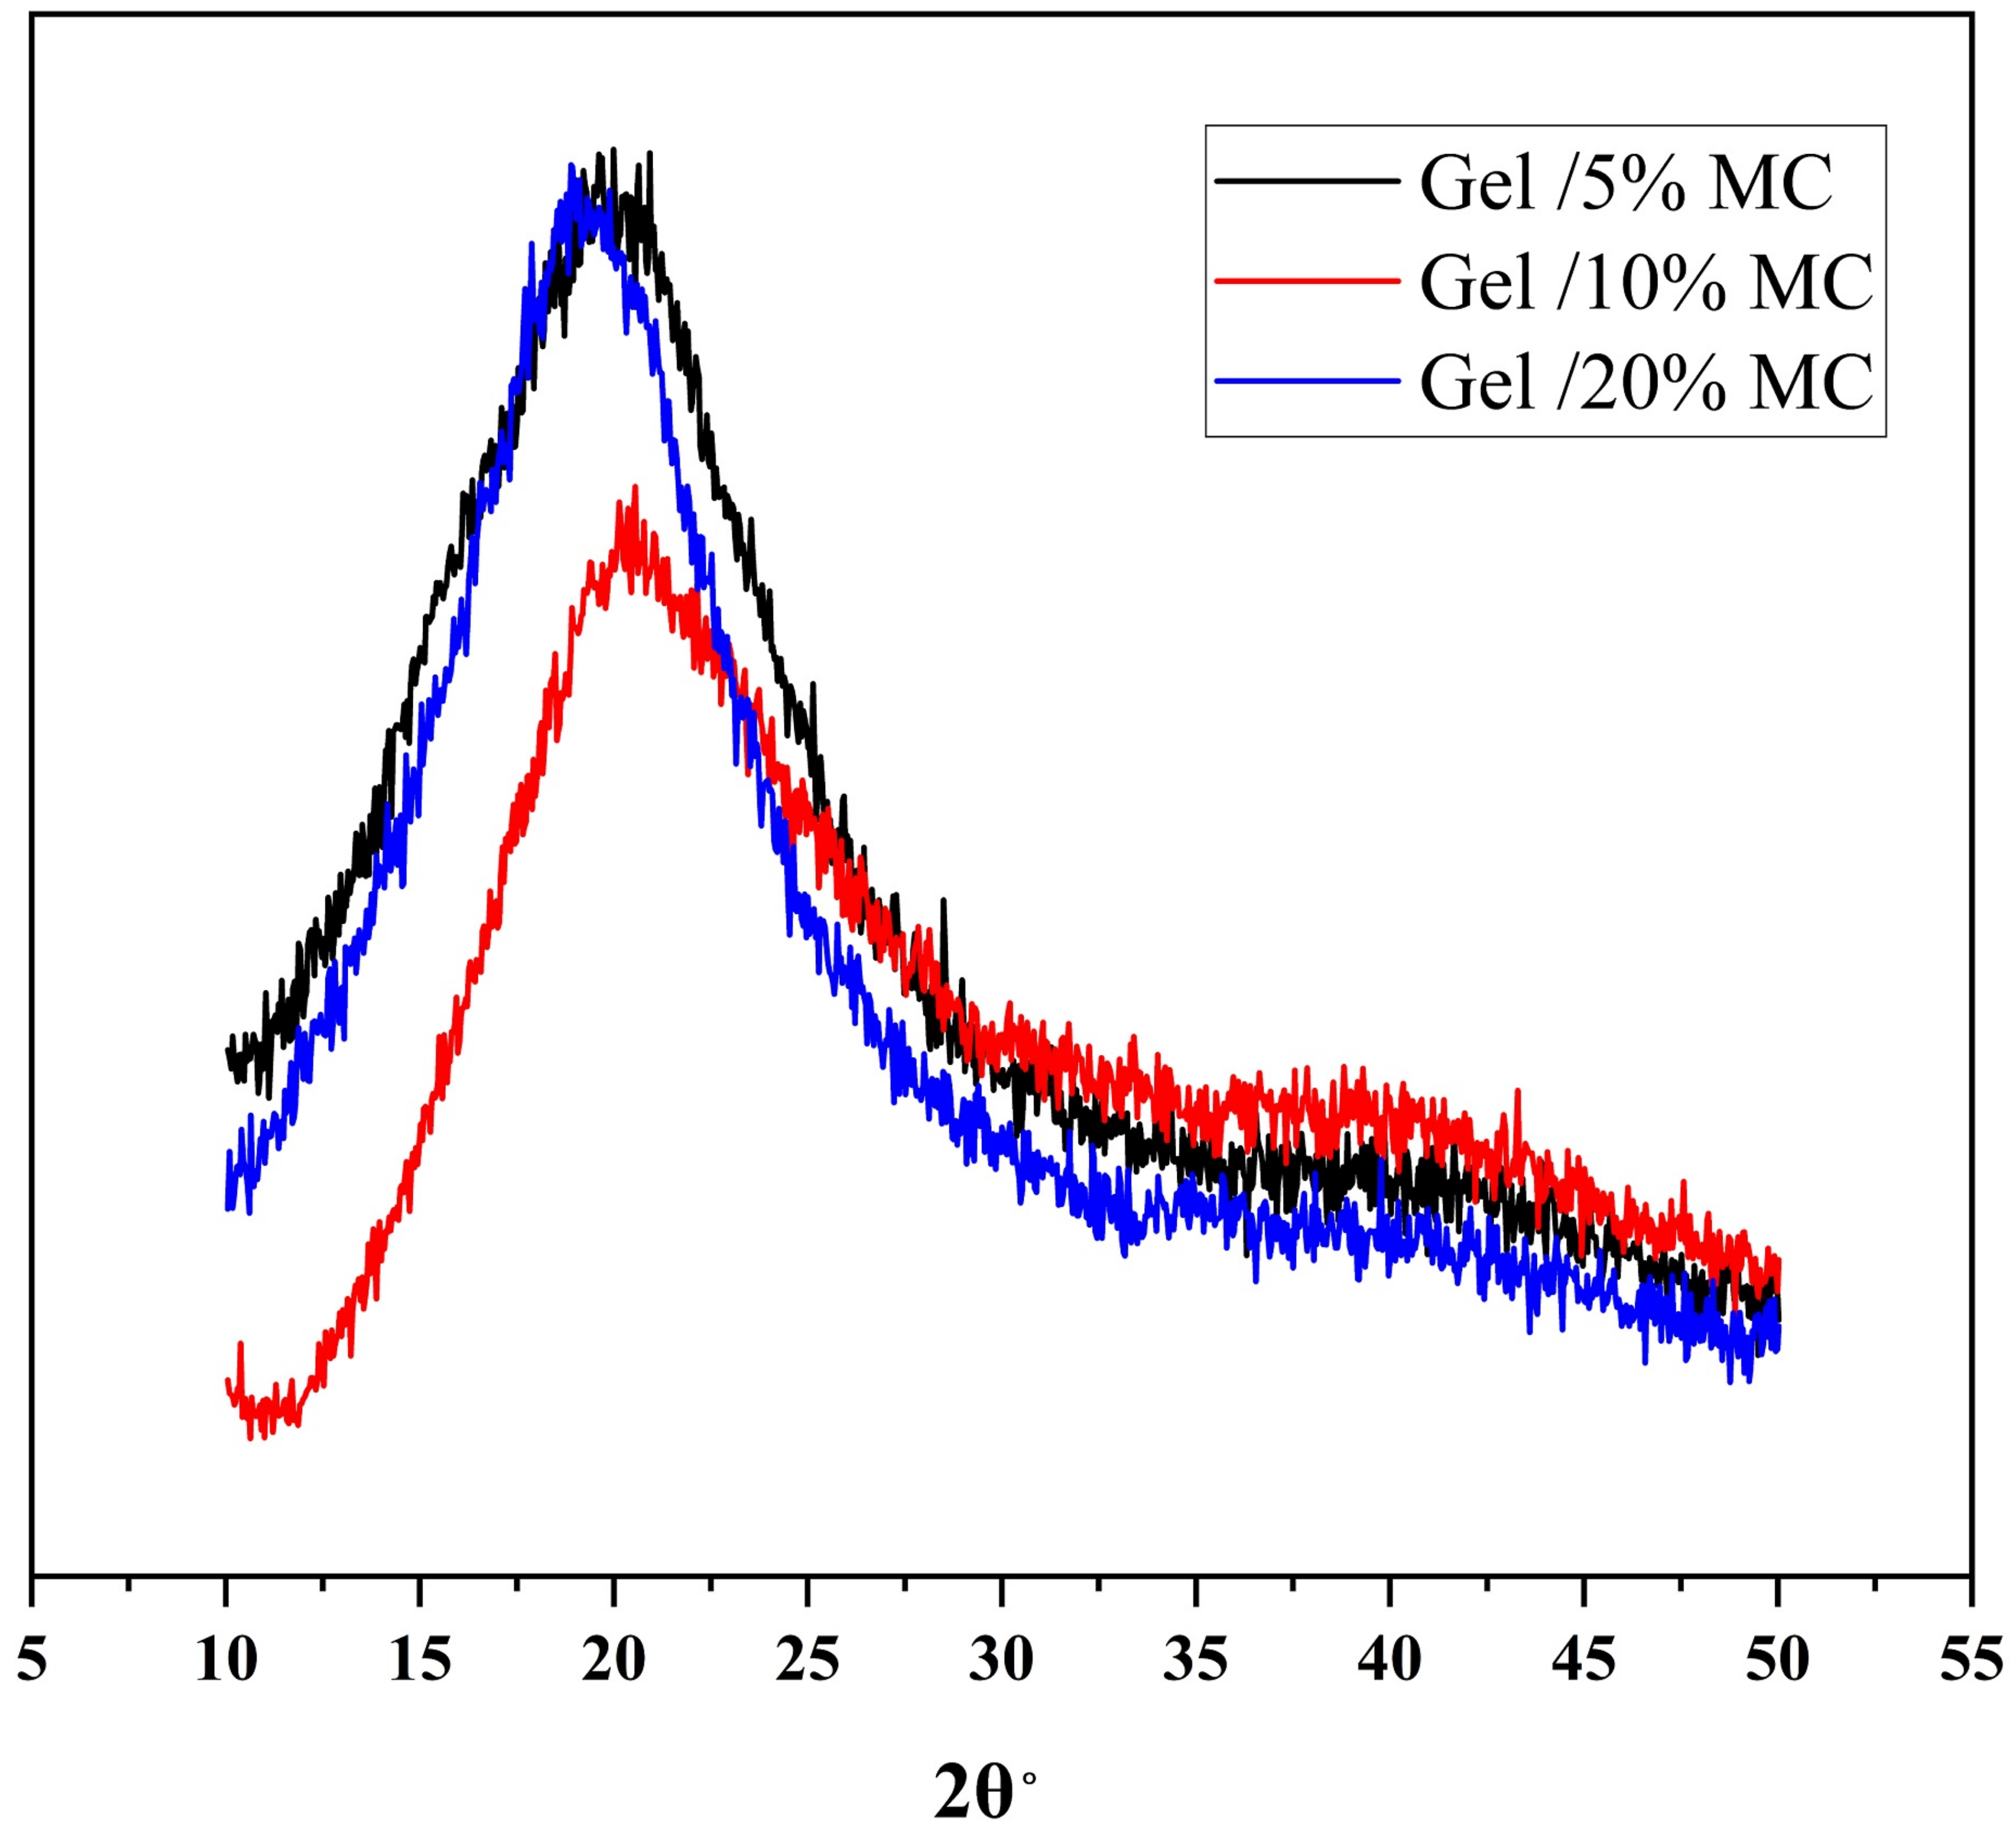

Supplement: d1nj02859f7.pdf [file d1nj02859f7.pdf]
